# Supplementary material for: Lipophilic Shellfish Poisoning Toxins in Marine Invertebrates from the Galician Coast
Source: MDPI journal article supplement (doi:10.3390/toxins15110631), 2023-10-27
Supplement: s1 [file s1]

# Supplementary material: Lipophilic shellfish poisoning toxins in marine invertebrates from the Galician coast

Table S1. Date, sampling location, Ría, class, and species analyzed in the study between 2021 to 2022.

| Date           | Sampling location         | Ría       | Class       | Species                          |
|----------------|---------------------------|-----------|-------------|----------------------------------|
| May 11, 2021   | Ferrol. As Pías           | Ferrol    | Bivalves    | <i>Modiolus modiolus</i>         |
| May 11, 2021   | Ferrol. As Pías           | Ferrol    | Bivalves    | <i>Acanthocardia tuberculata</i> |
| May 25, 2021   | Vilanova de Arousa. Corón | Arousa    | Bivalves    | <i>Ensis siliqua</i>             |
| May 25, 2021   | Vilanova de Arousa. Corón | Arousa    | Bivalves    | <i>Ruditapes philippinarum</i>   |
| May 25, 2021   | Vilanova de Arousa. Corón | Arousa    | Bivalves    | <i>Cerastoderma edule</i>        |
| May 25, 2021   | Vilanova de Arousa. Corón | Arousa    | Bivalves    | <i>Mytilus galloprovincialis</i> |
| May 25, 2021   | Vilanova de Arousa. Corón | Arousa    | Crustaceans | <i>Polybius sp.</i>              |
| May 25, 2021   | Vilanova de Arousa. Corón | Arousa    | Crustaceans | <i>Polybius sp.</i>              |
| May 25, 2021   | Vilanova de Arousa. Corón | Arousa    | Gastropods  | <i>Ocenebra sp.</i>              |
| May 25, 2021   | Lira. Ximprón             | Corcubión | Echinoderms | <i>n.i.</i>                      |
| July 26, 2021  | Vilanova de Arousa. Corón | Arousa    | Cnidarias   | <i>n.i.</i>                      |
| July 26, 2021  | Vilanova de Arousa. Corón | Arousa    | Gastropods  | <i>Gibbula sp.</i>               |
| July 26, 2021  | Vilanova de Arousa. Corón | Arousa    | Bivalves    | <i>Mytilus galloprovincialis</i> |
| July 26, 2021  | Vilanova de Arousa. Corón | Arousa    | Gastropods  | <i>Nucella sp.</i>               |
| July 26, 2021  | Vilanova de Arousa. Corón | Arousa    | Gastropods  | <i>Littorina sp.</i>             |
| July 26, 2021  | Vilanova de Arousa. Corón | Arousa    | Gastropods  | <i>Patella sp.</i>               |
| August 5, 2021 | Rianxo. Porrón            | Arousa    | Gastropods  | <i>Littorina sp.</i>             |
| August 5, 2021 | Rianxo. Porrón            | Arousa    | Crustaceans | <i>Polybius sp.</i>              |
| August 5, 2021 | Rianxo. Porrón            | Arousa    | Bivalves    | <i>Mytilus galloprovincialis</i> |
| August 6, 2021 | Vilanova de Arousa. Corón | Arousa    | Gastropods  | <i>Nucella sp.</i>               |
| August 6, 2021 | Vilanova de Arousa. Corón | Arousa    | Bivalves    | <i>Ruditapes philippinarum</i>   |
| August 6, 2021 | Vilanova de Arousa. Corón | Arousa    | Bivalves    | <i>Cerastoderma edule</i>        |
| August 6, 2021 | Vilanova de Arousa. Corón | Arousa    | Bivalves    | <i>Mytilus galloprovincialis</i> |

|                    |                           |            |             |                                  |
|--------------------|---------------------------|------------|-------------|----------------------------------|
| August 6, 2021     | Vilanova de Arousa. Corón | Arousa     | Gastropods  | <i>Littorina sp.</i>             |
| August 6, 2021     | Vilanova de Arousa. Corón | Arousa     | Gastropods  | <i>Littorina sp.</i>             |
| August 6, 2021     | Vilanova de Arousa. Corón | Arousa     | Cnidarias   | <i>n.i.</i>                      |
| August 6, 2021     | Vilanova de Arousa. Corón | Arousa     | Crustaceans | <i>Balanus sp.</i>               |
| August 6, 2021     | Vilanova de Arousa. Corón | Arousa     | Gastropods  | <i>Patella sp.</i>               |
| August 20, 2021    | Vilanova de Arousa. Corón | Arousa     | Crustaceans | <i>Balanus sp.</i>               |
| August 20, 2021    | Vilanova de Arousa. Corón | Arousa     | Gastropods  | <i>Littorina sp.</i>             |
| August 20, 2021    | Vilanova de Arousa. Corón | Arousa     | Gastropods  | <i>Littorina sp.</i>             |
| August 20, 2021    | Vilanova de Arousa. Corón | Arousa     | Gastropods  | <i>Nucella sp.</i>               |
| August 20, 2021    | Vilanova de Arousa. Corón | Arousa     | Cnidarias   | <i>n.i.</i>                      |
| August 20, 2021    | Vilanova de Arousa. Corón | Arousa     | Bivalves    | <i>Mytilus galloprovincialis</i> |
| August 20, 2021    | Vilanova de Arousa. Corón | Arousa     | Gastropods  | <i>Patella sp.</i>               |
| August 9, 2021     | Nerga. Os Castros         | Vigo       | Gastropods  | <i>Patella sp.</i>               |
| August 9, 2021     | Nerga. Os Castros         | Vigo       | Echinoderms | <i>n.i.</i>                      |
| August 9, 2021     | Nerga. Os Castros         | Vigo       | Cnidarias   | <i>n.i.</i>                      |
| August 9, 2021     | Nerga. Os Castros         | Vigo       | Gastropods  | <i>Littorina sp.</i>             |
| August 10, 2021    | Aldán. Vilariño           | Pontevedra | Gastropods  | <i>Patella sp.</i>               |
| August 10, 2021    | Aldán. Vilariño           | Pontevedra | Cnidarias   | <i>n.i.</i>                      |
| August 10, 2021    | Aldán. Vilariño           | Pontevedra | Gastropods  | <i>Littorina sp.</i>             |
| August 25, 2021    | Bueu. Beluso              | Pontevedra | Echinoderms | <i>n.i.</i>                      |
| August 25, 2021    | Bueu. Beluso              | Pontevedra | Gastropods  | <i>Nucella sp.</i>               |
| August 25, 2021    | Bueu. Beluso              | Pontevedra | Gastropods  | <i>Littorina sp.</i>             |
| August 25, 2021    | Bueu. Beluso              | Pontevedra | Gastropods  | <i>Crepidula sp. fornicata</i>   |
| August 25, 2021    | Bueu. Beluso              | Pontevedra | Echinoderms | <i>n.i.</i>                      |
| August 25, 2021    | Bueu. Beluso              | Pontevedra | Cnidarias   | <i>n.i.</i>                      |
| August 25, 2021    | Bueu. Beluso              | Pontevedra | Gastropods  | <i>Patella sp.</i>               |
| August 25, 2021    | Bueu. Beluso              | Pontevedra | Bivalves    | <i>Mytilus galloprovincialis</i> |
| September 23, 2021 | Vilanova de Arousa. Corón | Arousa     | Gastropods  | <i>Monodonta sp.</i>             |
| September 23, 2021 | Vilanova de Arousa. Corón | Arousa     | Gastropods  | <i>Gibbula sp.</i>               |

|                    |                           |            |             |                                  |
|--------------------|---------------------------|------------|-------------|----------------------------------|
| September 23, 2021 | Vilanova de Arousa. Corón | Arousa     | Gastropods  | <i>Nucella sp.</i>               |
| September 23, 2021 | Vilanova de Arousa. Corón | Arousa     | Gastropods  | <i>Littorina sp.</i>             |
| September 23, 2021 | Vilanova de Arousa. Corón | Arousa     | Cnidarias   | <i>n.i.</i>                      |
| September 23, 2021 | Vilanova de Arousa. Corón | Arousa     | Gastropods  | <i>Patella sp.</i>               |
| September 23, 2021 | Vilanova de Arousa. Corón | Arousa     | Bivalves    | <i>Mytilus galloprovincialis</i> |
| May 26, 2021       | Muros I. Esteiro          | Muros-Noia | Gastropods  | <i>Patella sp.</i>               |
| September 7, 2021  | Rianxo. Porrón            | Arousa     | Bivalves    | <i>Mytilus galloprovincialis</i> |
| September 24, 2021 | Rianxo. Salto do ladrón   | Arousa     | Gastropods  | <i>Littorina sp.</i>             |
| September 24, 2021 | Rianxo. Salto do ladrón   | Arousa     | Bivalves    | <i>Mytilus galloprovincialis</i> |
| September 24, 2021 | Rianxo. Salto do ladrón   | Arousa     | Gastropods  | <i>n.i.</i>                      |
| June 29, 2021      | Barallobre                | Ferrol     | Bivalves    | <i>Mytilus galloprovincialis</i> |
| June 29, 2021      | Miño                      | Betanzos   | Bivalves    | <i>Ruditapes philippinarum</i>   |
| June 29, 2021      | Pasaxe. Sta Cristina      | A Coruña   | Bivalves    | <i>Cerastoderma edule</i>        |
| June 29, 2021      | Camariñas                 | Camariñas  | Bivalves    | <i>Mytilus galloprovincialis</i> |
| June 30, 2021      | Corcubión. Pr.Cee         | Corcubión  | Bivalves    | <i>Mytilus galloprovincialis</i> |
| June 30, 2021      | Barqueiro                 | Barqueiro  | Bivalves    | <i>Cerastoderma edule</i>        |
| July 2, 2021       | Arousa I. Meloxo          | Arousa     | Bivalves    | <i>Venerupis pullastra</i>       |
| July 2, 2021       | Arousa VI                 | Arousa     | Bivalves    | <i>Venerupis pullastra</i>       |
| July 2, 2021       | Muros I. Abelleira        | Muros-Noia | Bivalves    | <i>Cerastoderma edule</i>        |
| July 5, 2021       | Muros I                   | Muros-Noia | Bivalves    | <i>Cerastoderma edule</i>        |
| July 6, 2021       | Barqueiro. San Fiz        | Barqueiro  | Bivalves    | <i>Magallana gigas</i>           |
| July 6, 2021       | Miño. Lombo Espiñeira     | Betanzos   | Bivalves    | <i>Ruditapes philippinarum</i>   |
| July 6, 2021       | Pasaxe. Sta Cristina      | A Coruña   | Bivalves    | <i>Cerastoderma edule</i>        |
| July 6, 2021       | Camariñas. Enseada Vasa   | Camariñas  | Bivalves    | <i>Mytilus galloprovincialis</i> |
| July 6, 2021       | Arousa VI. Sarrido        | Arousa     | Bivalves    | <i>Ruditapes philippinarum</i>   |
| October 29, 2021   | Arousa                    | Arousa     | Polychaetes | <i>Aphrodita aculeata</i>        |
| July 8, 2021       | Barallobre. Rampa         | Ferrol     | Bivalves    | <i>Mytilus galloprovincialis</i> |
| July 7, 2021       | Corcubión. Pr.Cee         | Corcubión  | Bivalves    | <i>Cerastoderma edule</i>        |
| July 7, 2021       | Arousa I. Meloxo          | Arousa     | Bivalves    | <i>Venerupis pullastra</i>       |

|                |                          |            |          |                                  |
|----------------|--------------------------|------------|----------|----------------------------------|
| July 14, 2021  | Barqueiro. Pr. Salgueira | Barqueiro  | Bivalves | <i>Mytilus galloprovincialis</i> |
| July 13, 2021  | Barallobre. Rampa        | Ferrol     | Bivalves | <i>Mytilus galloprovincialis</i> |
| July 13, 2021  | Miño. Lombo Espiñeira    | Betanzos   | Bivalves | <i>Ruditapes philippinarum</i>   |
| July 13, 2021  | Pasaxe. Sta Cristina     | A Coruña   | Bivalves | <i>Cerastoderma edule</i>        |
| July 13, 2021  | Camariñas. Enseada Vasa  | Camariñas  | Bivalves | <i>Mytilus galloprovincialis</i> |
| July 13, 2021  | Corcubión. Pr.Cee        | Corcubión  | Bivalves | <i>Mytilus galloprovincialis</i> |
| July 15, 2021  | Camariñas. Rio da Ponte  | Camariñas  | Bivalves | <i>Ruditapes decussatus</i>      |
| July 20, 2021  | Barqueiro. Pr. Salgueira | Barqueiro  | Bivalves | <i>Mytilus galloprovincialis</i> |
| July 21, 2021  | Miño. Lombo Espiñeira    | Betanzos   | Bivalves | <i>Ruditapes philippinarum</i>   |
| July 20, 2021  | Pasaxe. Sta Cristina     | A Coruña   | Bivalves | <i>Cerastoderma edule</i>        |
| July 21, 2021  | Camariñas. Rio da Ponte  | Camariñas  | Bivalves | <i>Ruditapes decussatus</i>      |
| July 21, 2021  | Corcubión. Pr.Cee        | Corcubión  | Bivalves | <i>Mytilus galloprovincialis</i> |
| July 23, 2021  | Muros I. Abelleira       | Muros-Noia | Bivalves | <i>Cerastoderma edule</i>        |
| July 27, 2021  | Barqueiro. Pr. Salgueira | Barqueiro  | Bivalves | <i>Mytilus galloprovincialis</i> |
| July 27, 2021  | Miño. Lombo Espiñeira    | Betanzos   | Bivalves | <i>Ruditapes philippinarum</i>   |
| July 27, 2021  | Pasaxe. Sta Cristina     | A Coruña   | Bivalves | <i>Cerastoderma edule</i>        |
| July 27, 2021  | Camariñas                | Camariñas  | Bivalves | <i>Ruditapes decussatus</i>      |
| July 29, 2021  | Corcubión. Pr.Cee        | Corcubión  | Bivalves | <i>Mytilus galloprovincialis</i> |
| July 27, 2021  | Muros I. Abelleira       | Muros-Noia | Bivalves | <i>Cerastoderma edule</i>        |
| July 27, 2021  | Muros III. Testal        | Muros-Noia | Bivalves | <i>Cerastoderma edule</i>        |
| July 29, 2021  | Pont II. Niño do Corvo   | Pontevedra | Bivalves | <i>Ensis ensis</i>               |
| July 28, 2021  | Pont V. Placeres         | Pontevedra | Bivalves | <i>Ruditapes philippinarum</i>   |
| July 29, 2021  | Vigo I. Cies             | Vigo       | Bivalves | <i>Venerupis rhomboides</i>      |
| July 29, 2021  | Vigo II.2 Xunqueira      | Vigo       | Bivalves | <i>Ruditapes philippinarum</i>   |
| August 3, 2021 | Barqueiro. San Fiz       | Barqueiro  | Bivalves | <i>Mytilus galloprovincialis</i> |
| August 6, 2021 | Barallobre. Rampa        | Ferrol     | Bivalves | <i>Mytilus galloprovincialis</i> |
| August 4, 2021 | Miño. Lombo Espiñeira    | Betanzos   | Bivalves | <i>Venerupis pullastra</i>       |
| August 6, 2021 | Camariñas. Enseada Vasa  | Camariñas  | Bivalves | <i>Ruditapes decussatus</i>      |
| August 3, 2021 | Corcubión. Pr.Cee        | Corcubión  | Bivalves | <i>Mytilus galloprovincialis</i> |

|                   |                          |            |          |                                  |
|-------------------|--------------------------|------------|----------|----------------------------------|
| August 5, 2021    | Pont II. San Cibrao      | Pontevedra | Bivalves | <i>Ruditapes philippinarum</i>   |
| August 3, 2021    | Pont V. Campelo          | Pontevedra | Bivalves | <i>Ruditapes philippinarum</i>   |
| August 4, 2021    | Vigo I. Cies             | Vigo       | Bivalves | <i>Venerupis rhomboides</i>      |
| August 3, 2021    | Vigo II.2 Xunqueira      | Vigo       | Bivalves | <i>Ruditapes philippinarum</i>   |
| August 11, 2021   | Barqueiro. Pr. Salgueira | Barqueiro  | Bivalves | <i>Mytilus galloprovincialis</i> |
| August 10, 2021   | Barallobre. Rampa        | Ferrol     | Bivalves | <i>Mytilus galloprovincialis</i> |
| August 10, 2021   | Miño. Lombo Espiñeira    | Betanzos   | Bivalves | <i>Ruditapes philippinarum</i>   |
| August 10, 2021   | Pasaxe. Sta Cristina     | A Coruña   | Bivalves | <i>Cerastoderma edule</i>        |
| August 10, 2021   | Camariñas. Rio da Ponte  | Camariñas  | Bivalves | <i>Ruditapes decussatus</i>      |
| August 11, 2021   | Muros I. Abelleira       | Muros-Noia | Bivalves | <i>Cerastoderma edule</i>        |
| August 18, 2021   | Barqueiro. Pr. Salgueira | Barqueiro  | Bivalves | <i>Mytilus galloprovincialis</i> |
| August 19, 2021   | Barallobre. Rampa        | Ferrol     | Bivalves | <i>Mytilus galloprovincialis</i> |
| August 18, 2021   | Miño. Lombo Espiñeira    | Betanzos   | Bivalves | <i>Ruditapes philippinarum</i>   |
| August 17, 2021   | Pasaxe. Sta Cristina     | A Coruña   | Bivalves | <i>Cerastoderma edule</i>        |
| August 18, 2021   | Camariñas. Rio da Ponte  | Camariñas  | Bivalves | <i>Ruditapes decussatus</i>      |
| August 17, 2021   | Corcubión. Pr.Cee        | Corcubión  | Bivalves | <i>Cerastoderma edule</i>        |
| August 18, 2021   | Muros I                  | Muros-Noia | Bivalves | <i>Cerastoderma edule</i>        |
| August 24, 2021   | Barallobre               | Ferrol     | Bivalves | <i>Mytilus galloprovincialis</i> |
| August 25, 2021   | Miño. Lombo Espiñeira    | Betanzos   | Bivalves | <i>Ruditapes philippinarum</i>   |
| August 24, 2021   | Pasaxe. Sta Cristina     | A Coruña   | Bivalves | <i>Cerastoderma edule</i>        |
| August 24, 2021   | Camariñas. Rio da Ponte  | Camariñas  | Bivalves | <i>Ruditapes decussatus</i>      |
| August 25, 2021   | Corcubión                | Corcubión  | Bivalves | <i>Cerastoderma edule</i>        |
| August 24, 2021   | Muros I                  | Muros-Noia | Bivalves | <i>Cerastoderma edule</i>        |
| August 26, 2021   | Arousa I. Meloxo         | Arousa     | Bivalves | <i>Venerupis pullastra</i>       |
| August 23, 2021   | Arousa VI                | Arousa     | Bivalves | <i>Ruditapes philippinarum</i>   |
| August 23, 2021   | Pont II. Aldán           | Pontevedra | Bivalves | <i>Venerupis rhomboides</i>      |
| August 25, 2021   | Pont V. Placeres         | Pontevedra | Bivalves | <i>Ruditapes philippinarum</i>   |
| August 24, 2021   | Vigo II.2                | Vigo       | Bivalves | <i>Ruditapes philippinarum</i>   |
| September 1, 2021 | Barallobre. Rampa        | Ferrol     | Bivalves | <i>Mytilus galloprovincialis</i> |

|                   |                         |            |             |                                  |
|-------------------|-------------------------|------------|-------------|----------------------------------|
| August 31, 2021   | Miño. Lombo Espiñeira   | Betanzos   | Bivalves    | <i>Ruditapes philippinarum</i>   |
| August 31, 2021   | Pasaxe. Sta Cristina    | A Coruña   | Bivalves    | <i>Cerastoderma edule</i>        |
| September 3, 2021 | Camariñas. Rio da Ponte | Camariñas  | Bivalves    | <i>Ruditapes philippinarum</i>   |
| August 31, 2021   | Corcubión. Pr.Cee       | Corcubión  | Bivalves    | <i>Cerastoderma edule</i>        |
| August 31, 2021   | Muros I                 | Muros-Noia | Bivalves    | <i>Cerastoderma edule</i>        |
| August 31, 2021   | Pont II. Area Brava     | Pontevedra | Bivalves    | <i>Venerupis rhomboides</i>      |
| September 3, 2021 | Pont V                  | Pontevedra | Bivalves    | <i>Ruditapes philippinarum</i>   |
| November 7, 2021  | Rianxo. Porrón          | Arousa     | Crustaceans | <i>Polybius sp.</i>              |
| November 7, 2021  | Rianxo. Porrón          | Arousa     | Bivalves    | <i>Cerastoderma edule</i>        |
| November 7, 2021  | Rianxo. Porrón          | Arousa     | Echinoderms | <i>Asterina sp.</i>              |
| November 7, 2021  | Rianxo. Porrón          | Arousa     | Bivalves    | <i>Mytilus galloprovincialis</i> |
| November 7, 2021  | Rianxo. Porrón          | Arousa     | Gastropods  | <i>n.i.</i>                      |
| November 7, 2021  | Rianxo. Porrón          | Arousa     | Poriferous  | <i>n.i.</i>                      |
| November 7, 2021  | Rianxo. Porrón          | Arousa     | Crustaceans | <i>n.i.</i>                      |
| November 5, 2021  | Ramalloa. Esteiro Foz   | Vigo       | Bivalves    | <i>Ruditapes philippinarum</i>   |
| November 5, 2021  | Ramalloa. Esteiro Foz   | Vigo       | Gastropods  | <i>Littorina sp.</i>             |
| November 5, 2021  | Ramalloa. Esteiro Foz   | Vigo       | Gastropods  | <i>Patella sp.</i>               |
| November 5, 2021  | Ramalloa. Esteiro Foz   | Vigo       | Bivalves    | <i>Mytilus galloprovincialis</i> |
| November 5, 2021  | Ramalloa. Esteiro Foz   | Vigo       | Cnidarias   | <i>n.i.</i>                      |
| November 5, 2021  | Ramalloa. Esteiro Foz   | Vigo       | Bivalves    | <i>Ostrea edulis</i>             |
| November 8, 2021  | Porto do Son. Arnela    | Muros-Noia | Gastropods  | <i>Monodonta sp.</i>             |
| November 8, 2021  | Porto do Son. Arnela    | Muros-Noia | Gastropods  | <i>Gibbula sp.</i>               |
| November 8, 2021  | Porto do Son. Arnela    | Muros-Noia | Gastropods  | <i>Nucella sp.</i>               |
| November 8, 2021  | Porto do Son. Arnela    | Muros-Noia | Polychaetes | <i>n.i.</i>                      |
| November 8, 2021  | Porto do Son. Arnela    | Muros-Noia | Echinoderms | <i>Asterina sp.</i>              |
| November 8, 2021  | Porto do Son. Arnela    | Muros-Noia | Cnidarias   | <i>n.i.</i>                      |
| November 8, 2021  | Porto do Son. Arnela    | Muros-Noia | Gastropods  | <i>Patella sp.</i>               |
| November 8, 2021  | Porto do Son. Arnela    | Muros-Noia | Gastropods  | <i>Patella sp.</i>               |
| November 8, 2021  | Porto do Son. Arnela    | Muros-Noia | Gastropods  | <i>Patella sp.</i>               |

|                   |                          |            |             |                                    |
|-------------------|--------------------------|------------|-------------|------------------------------------|
| November 8, 2021  | Porto do Son. Arnela     | Muros-Noia | Bivalves    | <i>Mytilus galloprovincialis</i>   |
| November 8, 2021  | Porto do Son. Arnela     | Muros-Noia | Bivalves    | <i>Mytilus galloprovincialis</i>   |
| November 8, 2021  | Pont V. Placeres         | Pontevedra | Gastropods  | <i>Littorina sp.</i>               |
| November 8, 2021  | Pont V. Placeres         | Pontevedra | Gastropods  | <i>Patella sp.</i>                 |
| November 8, 2021  | Pont V. Placeres         | Pontevedra | Crustaceans | <i>Polybius sp.</i>                |
| November 8, 2021  | Pont V. Placeres         | Pontevedra | Bivalves    | <i>Ostrea edulis</i>               |
| November 8, 2021  | Pont V. Placeres         | Pontevedra | Bivalves    | <i>Ruditapes philippinarum</i>     |
| November 8, 2021  | Pont V. Placeres         | Pontevedra | Crustaceans | <i>Balanus sp.</i>                 |
| November 8, 2021  | Pont V. Placeres         | Pontevedra | Bivalves    | <i>Cerastoderma edule</i>          |
| November 8, 2021  | Pont V. Placeres         | Pontevedra | Bivalves    | <i>Mytilus galloprovincialis</i>   |
| September 1, 2021 | Arousa. Bohido           | Arousa     | Bivalves    | <i>Tellina donacina</i>            |
| September 1, 2021 | Arousa. Bohido           | Arousa     | Echinoderms | <i>Leptosynapta sp.</i>            |
| September 1, 2021 | Arousa. Bohido           | Arousa     | Gastropods  | <i>Crepidula sp. fornicata</i>     |
| September 1, 2021 | Arousa. Bohido           | Arousa     | Bivalves    | <i>Gari depressa</i>               |
| September 1, 2021 | Arousa. Bohido           | Arousa     | Bivalves    | <i>Lutraria sp.</i>                |
| September 1, 2021 | Arousa. Bohido           | Arousa     | Polychaetes | <i>Sipunculus nudus</i>            |
| September 1, 2021 | Arousa. Bohido           | Arousa     | Crustaceans | <i>Atelecyclus undecimdentatus</i> |
| November 9, 2021  | Rianxo                   | Arousa     | Gastropods  | <i>Crepidula sp.</i>               |
| November 9, 2021  | Rianxo                   | Arousa     | Bivalves    | <i>Aequipecten opercularis</i>     |
| November 9, 2021  | Rianxo                   | Arousa     | Bivalves    | <i>Pecten maximus</i>              |
| November 9, 2021  | Rianxo                   | Arousa     | Bivalves    | <i>Chlamys varia</i>               |
| September 3, 2021 | Vigo II.2                | Vigo       | Bivalves    | <i>Ruditapes philippinarum</i>     |
| September 7, 2021 | Barqueiro. Pr. Salgueira | Barqueiro  | Bivalves    | <i>Mytilus galloprovincialis</i>   |
| September 8, 2021 | Barallobre. Rampa        | Ferrol     | Bivalves    | <i>Mytilus galloprovincialis</i>   |
| September 7, 2021 | Miño. Lombo Espiñeira    | Betanzos   | Bivalves    | <i>Ruditapes philippinarum</i>     |
| September 7, 2021 | Pasaxe. Sta Cristina     | A Coruña   | Bivalves    | <i>Cerastoderma edule</i>          |
| September 7, 2021 | Camariñas. Rio da Ponte  | Camariñas  | Bivalves    | <i>Ruditapes decussatus</i>        |
| September 8, 2021 | Corcubión. Pr.Cee        | Corcubión  | Bivalves    | <i>Cerastoderma edule</i>          |
| September 7, 2021 | Muros I. Abelleira       | Muros-Noia | Bivalves    | <i>Cerastoderma edule</i>          |

|                    |                          |            |          |                                  |
|--------------------|--------------------------|------------|----------|----------------------------------|
| September 7, 2021  | Muros III. Testal        | Muros-Noia | Bivalves | <i>Cerastoderma edule</i>        |
| September 7, 2021  | Pont V. Placeres         | Pontevedra | Bivalves | <i>Ruditapes philippinarum</i>   |
| September 15, 2021 | Barqueiro. Pr. Salgueira | Barqueiro  | Bivalves | <i>Mytilus galloprovincialis</i> |
| September 15, 2021 | Barallobre. Rampa        | Ferrol     | Bivalves | <i>Mytilus galloprovincialis</i> |
| September 14, 2021 | Miño. Lombo Espiñeira    | Betanzos   | Bivalves | <i>Ruditapes philippinarum</i>   |
| September 14, 2021 | Pasaxe. Sta Cristina     | A Coruña   | Bivalves | <i>Cerastoderma edule</i>        |
| September 16, 2021 | Camariñas. Ariño         | Camariñas  | Bivalves | <i>Ruditapes decussatus</i>      |
| September 14, 2021 | Corcubión. Pr.Cee        | Corcubión  | Bivalves | <i>Cerastoderma edule</i>        |
| September 13, 2021 | Muros III                | Muros-Noia | Bivalves | <i>Cerastoderma edule</i>        |
| September 14, 2021 | Arousa I. Rons           | Arousa     | Bivalves | <i>Venerupis pullastra</i>       |
| September 14, 2021 | Pont V. Placeres         | Pontevedra | Bivalves | <i>Ruditapes philippinarum</i>   |
| September 16, 2021 | Vigo I. Cies             | Vigo       | Bivalves | <i>Venerupis rhomboides</i>      |
| September 14, 2021 | Vigo II.2 Xunqueira      | Vigo       | Bivalves | <i>Ruditapes philippinarum</i>   |
| September 21, 2021 | Barqueiro. Pr. Salgueira | Barqueiro  | Bivalves | <i>Mytilus galloprovincialis</i> |
| September 23, 2021 | Barallobre. Rampa        | Ferrol     | Bivalves | <i>Mytilus galloprovincialis</i> |
| September 21, 2021 | Miño. Lombo Espiñeira    | Betanzos   | Bivalves | <i>Ruditapes philippinarum</i>   |
| September 21, 2021 | Pasaxe. Sta Cristina     | A Coruña   | Bivalves | <i>Cerastoderma edule</i>        |
| September 21, 2021 | Camariñas. Enseada Vasa  | Camariñas  | Bivalves | <i>Ruditapes decussatus</i>      |
| September 22, 2021 | Corcubión. Pr.Cee        | Corcubión  | Bivalves | <i>Mytilus galloprovincialis</i> |
| September 21, 2021 | Muros III                | Muros-Noia | Bivalves | <i>Cerastoderma edule</i>        |
| September 24, 2021 | Arousa VII               | Arousa     | Bivalves | <i>Ruditapes philippinarum</i>   |
| September 20, 2021 | Pont V. Placeres         | Pontevedra | Bivalves | <i>Ruditapes philippinarum</i>   |
| September 22, 2021 | Vigo I. Cies             | Vigo       | Bivalves | <i>Venerupis rhomboides</i>      |
| September 20, 2021 | Vigo II.2                | Vigo       | Bivalves | <i>Ruditapes philippinarum</i>   |
| September 30, 2021 | Barqueiro. Pr. Salgueira | Barqueiro  | Bivalves | <i>Mytilus galloprovincialis</i> |
| September 28, 2021 | Miño. Lombo Espiñeira    | Betanzos   | Bivalves | <i>Ruditapes philippinarum</i>   |
| September 28, 2021 | Pasaxe. Sta Cristina     | A Coruña   | Bivalves | <i>Cerastoderma edule</i>        |
| September 29, 2021 | Camariñas. Enseada Vasa  | Camariñas  | Bivalves | <i>Ruditapes decussatus</i>      |
| September 29, 2021 | Corcubión. Pr.Cee        | Corcubión  | Bivalves | <i>Mytilus galloprovincialis</i> |



|                    |                              |            |             |                                  |
|--------------------|------------------------------|------------|-------------|----------------------------------|
| September 28, 2021 | Muros I. Abelleira           | Muros-Noia | Bivalves    | <i>Cerastoderma edule</i>        |
| September 27, 2021 | Muros III. Testal            | Muros-Noia | Bivalves    | <i>Cerastoderma edule</i>        |
| October 1, 2021    | Arousa VII. Lombo das os     | Arousa     | Bivalves    | <i>Ruditapes philippinarum</i>   |
| September 28, 2021 | Pont V. Placeres             | Pontevedra | Bivalves    | <i>Ruditapes philippinarum</i>   |
| September 28, 2021 | Vigo I. Cies                 | Vigo       | Bivalves    | <i>Venerupis rhomboides</i>      |
| October 1, 2021    | Vigo II.2 Xunqueira          | Vigo       | Bivalves    | <i>Ruditapes philippinarum</i>   |
| October 5, 2021    | Barqueiro. Pr. Salgueira     | Barqueiro  | Bivalves    | <i>Mytilus galloprovincialis</i> |
| October 5, 2021    | Miño. Lombo Espiñeira        | Betanzos   | Bivalves    | <i>Ruditapes philippinarum</i>   |
| October 5, 2021    | Pasaxe. Sta Cristina         | A Coruña   | Bivalves    | <i>Cerastoderma edule</i>        |
| October 5, 2021    | Camariñas. Enseada Vasa      | Camariñas  | Bivalves    | <i>Ruditapes decussatus</i>      |
| October 5, 2021    | Corcubión. Pr.Cee            | Corcubión  | Bivalves    | <i>Cerastoderma edule</i>        |
| October 4, 2021    | Muros III. Testal            | Muros-Noia | Bivalves    | <i>Cerastoderma edule</i>        |
| October 5, 2021    | Pont V                       | Pontevedra | Bivalves    | <i>Ruditapes philippinarum</i>   |
| October 14, 2021   | Barqueiro. Pr. Salgueira     | Barqueiro  | Bivalves    | <i>Mytilus galloprovincialis</i> |
| October 14, 2021   | Miño. Lombo Espiñeira        | Betanzos   | Bivalves    | <i>Ruditapes philippinarum</i>   |
| October 14, 2021   | Pasaxe. Sta Cristina         | A Coruña   | Bivalves    | <i>Cerastoderma edule</i>        |
| October 14, 2021   | Camariñas. Enseada Vasa      | Camariñas  | Bivalves    | <i>Mytilus galloprovincialis</i> |
| October 13, 2021   | Corcubión. Pr.Cee            | Corcubión  | Bivalves    | <i>Cerastoderma edule</i>        |
| October 14, 2021   | Pont V. Placeres             | Pontevedra | Bivalves    | <i>Ruditapes philippinarum</i>   |
| October 19, 2021   | Barqueiro. Pr. Salgueira     | Barqueiro  | Bivalves    | <i>Mytilus galloprovincialis</i> |
| October 19, 2021   | Barallobre. Rampa            | Ferrol     | Bivalves    | <i>Mytilus galloprovincialis</i> |
| October 19, 2021   | Miño. Lombo Espiñeira        | Betanzos   | Bivalves    | <i>Ruditapes philippinarum</i>   |
| October 19, 2021   | Pasaxe. Sta Cristina         | A Coruña   | Bivalves    | <i>Cerastoderma edule</i>        |
| October 19, 2021   | Camariñas. Rio da Ponte      | Camariñas  | Bivalves    | <i>Ruditapes philippinarum</i>   |
| October 19, 2021   | Corcubión. Pr.Cee            | Corcubión  | Bivalves    | <i>Mytilus galloprovincialis</i> |
| October 19, 2021   | Muros III. Testal            | Muros-Noia | Bivalves    | <i>Cerastoderma edule</i>        |
| October 21, 2021   | Pont V. Placeres             | Pontevedra | Bivalves    | <i>Ruditapes philippinarum</i>   |
| November 30, 2021  | Carnota. Lira                | Corcubión  | Echinoderms | <i>Paracentrotus sp.</i>         |
| January 20, 2022   | Vilanova de Arousa. As Sinas | Arousa     | Cnidarias   | <i>Actinia sp.</i>               |

|                  |                              |            |             |                                  |
|------------------|------------------------------|------------|-------------|----------------------------------|
| January 20, 2022 | Vilanova de Arousa. As Sinas | Arousa     | Cnidarias   | <i>Actinia sp.</i>               |
| January 20, 2022 | Vilanova de Arousa. As Sinas | Arousa     | Gastropods  | <i>Monodonta sp.</i>             |
| January 20, 2022 | Vilanova de Arousa. As Sinas | Arousa     | Gastropods  | <i>Nucella sp.</i>               |
| January 20, 2022 | Vilanova de Arousa. As Sinas | Arousa     | Gastropods  | <i>Patella sp.</i>               |
| January 20, 2022 | Vilanova de Arousa. As Sinas | Arousa     | Crustaceans | <i>Balanus sp.</i>               |
| January 20, 2022 | Vilanova de Arousa. As Sinas | Arousa     | Bivalves    | <i>Mytilus galloprovincialis</i> |
| January 21, 2022 | Vilanova de Arousa. Corón    | Arousa     | Crustaceans | <i>Balanus sp.</i>               |
| January 21, 2022 | Vilanova de Arousa. Corón    | Arousa     | Gastropods  | <i>Patella sp.</i>               |
| January 21, 2022 | Vilanova de Arousa. Corón    | Arousa     | Cnidarias   | <i>Actinia sp.</i>               |
| January 21, 2022 | Vilanova de Arousa. Corón    | Arousa     | Bivalves    | <i>Mytilus galloprovincialis</i> |
| January 21, 2022 | Vilanova de Arousa. Corón    | Arousa     | Gastropods  | <i>Nucella sp.</i>               |
| January 21, 2022 | Vilanova de Arousa. Corón    | Arousa     | Gastropods  | <i>Monodonta sp.</i>             |
| January 21, 2022 | Vilanova de Arousa. Corón    | Arousa     | Gastropods  | <i>Littorina sp.</i>             |
| October 22, 2021 | Pont II. San Cibrao          | Pontevedra | Bivalves    | <i>Ruditapes philippinarum</i>   |
| October 27, 2021 | Barqueiro. Pr. Salgueira     | Barqueiro  | Bivalves    | <i>Mytilus galloprovincialis</i> |
| October 26, 2021 | Barallobre. Rampa            | Ferrol     | Bivalves    | <i>Mytilus galloprovincialis</i> |
| October 26, 2021 | Miño. Lombo Espiñeira        | Betanzos   | Bivalves    | <i>Cerastoderma edule</i>        |
| October 26, 2021 | Pasaxe. Sta Cristina         | A Coruña   | Bivalves    | <i>Cerastoderma edule</i>        |
| October 26, 2021 | Camariñas. Enseada Vasa      | Camariñas  | Bivalves    | <i>Mytilus galloprovincialis</i> |
| October 26, 2021 | Corcubión. Pr.Cee            | Corcubión  | Bivalves    | <i>Mytilus galloprovincialis</i> |
| October 27, 2021 | Pont V                       | Pontevedra | Bivalves    | <i>Ruditapes philippinarum</i>   |
| October 29, 2021 | Vigo I. Limens               | Vigo       | Bivalves    | <i>Ruditapes philippinarum</i>   |
| October 27, 2021 | Vigo II.2 Xunqueira          | Vigo       | Bivalves    | <i>Ruditapes philippinarum</i>   |
| November 3, 2021 | Barqueiro. Pr. Salgueira     | Barqueiro  | Bivalves    | <i>Mytilus galloprovincialis</i> |
| November 4, 2021 | Barallobre. Rampa            | Ferrol     | Bivalves    | <i>Mytilus galloprovincialis</i> |
| November 3, 2021 | Miño. Lombo Espiñeira        | Betanzos   | Bivalves    | <i>Cerastoderma edule</i>        |
| November 3, 2021 | Pasaxe. Sta Cristina         | A Coruña   | Bivalves    | <i>Cerastoderma edule</i>        |
| November 3, 2021 | Camariñas. Enseada Vasa      | Camariñas  | Bivalves    | <i>Mytilus galloprovincialis</i> |
| November 4, 2021 | Corcubión. Pr.Cee            | Corcubión  | Bivalves    | <i>Mytilus galloprovincialis</i> |

|                   |                          |            |          |                                  |
|-------------------|--------------------------|------------|----------|----------------------------------|
| November 3, 2021  | Muros III. Testal        | Muros-Noia | Bivalves | <i>Cerastoderma edule</i>        |
| November 3, 2021  | Vigo I. Liméns           | Vigo       | Bivalves | <i>Venerupis rhomboides</i>      |
| November 3, 2021  | Vigo II.2. Tirán         | Vigo       | Bivalves | <i>Venerupis rhomboides</i>      |
| November 9, 2021  | Barqueiro. Pr. Salgueira | Barqueiro  | Bivalves | <i>Mytilus galloprovincialis</i> |
| November 9, 2021  | Barallobre. Rampa        | Ferrol     | Bivalves | <i>Ruditapes philippinarum</i>   |
| November 9, 2021  | Miño. Lombo Espiñeira    | Betanzos   | Bivalves | <i>Cerastoderma edule</i>        |
| November 9, 2021  | Pasaxe. Sta Cristina     | A Coruña   | Bivalves | <i>Cerastoderma edule</i>        |
| November 9, 2021  | Camariñas. Río da Ponte  | Camariñas  | Bivalves | <i>Mytilus galloprovincialis</i> |
| November 11, 2021 | Corcubión. Pr.Cee        | Corcubión  | Bivalves | <i>Mytilus galloprovincialis</i> |
| November 9, 2021  | Pont V. Placeres         | Pontevedra | Bivalves | <i>Ruditapes philippinarum</i>   |
| November 10, 2021 | Vigo I                   | Vigo       | Bivalves | <i>Venerupis rhomboides</i>      |
| November 11, 2021 | Vigo II.2 Tirán          | Vigo       | Bivalves | <i>Venerupis rhomboides</i>      |
| November 17, 2021 | Barqueiro. Pr. Salgueira | Barqueiro  | Bivalves | <i>Mytilus galloprovincialis</i> |
| November 16, 2021 | Barallobre. Rampa        | Ferrol     | Bivalves | <i>Mytilus galloprovincialis</i> |
| November 17, 2021 | Miño. Muro Petra Sabio   | Betanzos   | Bivalves | <i>Mytilus galloprovincialis</i> |
| November 16, 2021 | Pasaxe. Sta Cristina     | A Coruña   | Bivalves | <i>Cerastoderma edule</i>        |
| November 16, 2021 | Camariñas. Río da ponte  | Camariñas  | Bivalves | <i>Mytilus galloprovincialis</i> |
| November 16, 2021 | Corcubión. Pr.Cee        | Corcubión  | Bivalves | <i>Mytilus galloprovincialis</i> |
| November 24, 2021 | Barqueiro. Pr. Salgueira | Barqueiro  | Bivalves | <i>Mytilus galloprovincialis</i> |
| November 23, 2021 | Barallobre. Rampa        | Ferrol     | Bivalves | <i>Mytilus galloprovincialis</i> |
| November 23, 2021 | Miño. Muro Petra Sabio   | Betanzos   | Bivalves | <i>Mytilus galloprovincialis</i> |
| November 23, 2021 | Pasaxe. Sta Cristina     | A Coruña   | Bivalves | <i>Cerastoderma edule</i>        |
| November 23, 2021 | Camariñas. Enseada Vasa  | Camariñas  | Bivalves | <i>Mytilus galloprovincialis</i> |
| November 23, 2021 | Corcubión. Pr.Cee        | Corcubión  | Bivalves | <i>Mytilus galloprovincialis</i> |
| November 26, 2021 | Vigo I                   | Vigo       | Bivalves | <i>Venerupis rhomboides</i>      |
| November 30, 2021 | Barqueiro. Pr. Salgueira | Barqueiro  | Bivalves | <i>Mytilus galloprovincialis</i> |
| November 30, 2021 | Barallobre. Rampa        | Ferrol     | Bivalves | <i>Mytilus galloprovincialis</i> |
| November 30, 2021 | Miño. Muro Petra Sabio   | Betanzos   | Bivalves | <i>Mytilus galloprovincialis</i> |
| November 30, 2021 | Pasaxe. Sta Cristina     | A Coruña   | Bivalves | <i>Cerastoderma edule</i>        |

|                   |                          |           |             |                                  |
|-------------------|--------------------------|-----------|-------------|----------------------------------|
| December 2, 2021  | Camariñas. Enseada Vasa  | Camariñas | Bivalves    | <i>Mytilus galloprovincialis</i> |
| November 30, 2021 | Corcubión. Pr.Cee        | Corcubión | Bivalves    | <i>Mytilus galloprovincialis</i> |
| December 9, 2021  | Barqueiro. Pr. Salgueira | Barqueiro | Bivalves    | <i>Mytilus galloprovincialis</i> |
| December 9, 2021  | Barallobre. Rampa        | Ferrol    | Bivalves    | <i>Mytilus galloprovincialis</i> |
| December 9, 2021  | Miño. Muro Petra Sabio   | Betanzos  | Bivalves    | <i>Mytilus galloprovincialis</i> |
| December 9, 2021  | Pasaxe. Sta Cristina     | A Coruña  | Bivalves    | <i>Cerastoderma edule</i>        |
| December 9, 2021  | Camariñas. Enseada Vasa  | Camariñas | Bivalves    | <i>Mytilus galloprovincialis</i> |
| December 10, 2021 | Corcubión. Pr.Cee        | Corcubión | Bivalves    | <i>Mytilus galloprovincialis</i> |
| December 15, 2021 | Barqueiro. Pr. Salgueira | Barqueiro | Bivalves    | <i>Mytilus galloprovincialis</i> |
| December 14, 2021 | Barallobre. Rampa        | Ferrol    | Bivalves    | <i>Mytilus galloprovincialis</i> |
| December 14, 2021 | Miño. Muro Petra Sabio   | Betanzos  | Bivalves    | <i>Mytilus galloprovincialis</i> |
| December 14, 2021 | Pasaxe. Sta Cristina     | A Coruña  | Bivalves    | <i>Cerastoderma edule</i>        |
| December 16, 2021 | Camariñas. Enseada Vasa  | Camariñas | Bivalves    | <i>Mytilus galloprovincialis</i> |
| December 15, 2021 | Corcubión. Pr.Cee        | Corcubión | Bivalves    | <i>Mytilus galloprovincialis</i> |
| February 4, 2022  | Carnota. Lira            | Corcubión | Echinoderms | <i>Paracentrotus sp.</i>         |
| December 21, 2021 | Barqueiro. Pr. Salgueira | Barqueiro | Bivalves    | <i>Mytilus galloprovincialis</i> |
| December 21, 2021 | Barallobre. Rampa        | Ferrol    | Bivalves    | <i>Mytilus galloprovincialis</i> |
| December 21, 2021 | Miño. Muro Petra Sabio   | Betanzos  | Bivalves    | <i>Mytilus galloprovincialis</i> |
| December 22, 2021 | Pasaxe. Sta Cristina     | A Coruña  | Bivalves    | <i>Cerastoderma edule</i>        |
| December 21, 2021 | Camariñas. Enseada Vasa  | Camariñas | Bivalves    | <i>Mytilus galloprovincialis</i> |
| December 23, 2021 | Corcubión. Pr.Cee        | Corcubión | Bivalves    | <i>Mytilus galloprovincialis</i> |
| December 29, 2021 | Barqueiro. Pr. Salgueira | Barqueiro | Bivalves    | <i>Mytilus galloprovincialis</i> |
| December 28, 2021 | Barallobre. Rampa        | Ferrol    | Bivalves    | <i>Mytilus galloprovincialis</i> |
| December 28, 2021 | Miño. Muro Petra Sabio   | Betanzos  | Bivalves    | <i>Mytilus galloprovincialis</i> |
| December 28, 2021 | Pasaxe. Sta Cristina     | A Coruña  | Bivalves    | <i>Cerastoderma edule</i>        |
| December 28, 2021 | Camariñas. Río da Ponte  | Camariñas | Bivalves    | <i>Mytilus galloprovincialis</i> |
| December 28, 2021 | Corcubión. Pr.Cee        | Corcubión | Bivalves    | <i>Mytilus galloprovincialis</i> |
| January 4, 2022   | Barqueiro. Pr. Salgueira | Barqueiro | Bivalves    | <i>Mytilus galloprovincialis</i> |
| January 4, 2022   | Barallobre. Pantalán     | Ferrol    | Bivalves    | <i>Mytilus galloprovincialis</i> |

|                  |                          |           |          |                                  |
|------------------|--------------------------|-----------|----------|----------------------------------|
| January 4, 2022  | Miño. Muro Petra Sabio   | Betanzos  | Bivalves | <i>Mytilus galloprovincialis</i> |
| January 4, 2022  | Pasaxe. Sta Cristina     | A Coruña  | Bivalves | <i>Cerastoderma edule</i>        |
| January 4, 2022  | Camariñas. Enseada Vasa  | Camariñas | Bivalves | <i>Mytilus galloprovincialis</i> |
| January 5, 2022  | Corcubión. Pr.Cee        | Corcubión | Bivalves | <i>Mytilus galloprovincialis</i> |
| January 12, 2022 | Barqueiro. Pr. Salgueira | Barqueiro | Bivalves | <i>Mytilus galloprovincialis</i> |
| January 11, 2022 | Barallobre. Rampa        | Ferrol    | Bivalves | <i>Mytilus galloprovincialis</i> |
| January 11, 2022 | Miño. Muro Petra Sabio   | Betanzos  | Bivalves | <i>Mytilus galloprovincialis</i> |
| January 11, 2022 | Pasaxe. Sta Cristina     | A Coruña  | Bivalves | <i>Cerastoderma edule</i>        |
| January 11, 2022 | Camariñas. Enseada Vasa  | Camariñas | Bivalves | <i>Mytilus galloprovincialis</i> |
| January 11, 2022 | Corcubión. Pr.Cee        | Corcubión | Bivalves | <i>Mytilus galloprovincialis</i> |
| January 20, 2022 | Barqueiro. Pr. Salgueira | Barqueiro | Bivalves | <i>Mytilus galloprovincialis</i> |
| January 19, 2022 | Barallobre. Rampa        | Ferrol    | Bivalves | <i>Mytilus galloprovincialis</i> |
| January 18, 2022 | Miño. Muro Petra Sabio   | Betanzos  | Bivalves | <i>Mytilus galloprovincialis</i> |
| January 18, 2022 | Pasaxe. Sta Cristina     | A Coruña  | Bivalves | <i>Mytilus galloprovincialis</i> |
| January 18, 2022 | Camariñas. Enseada Vasa  | Camariñas | Bivalves | <i>Mytilus galloprovincialis</i> |
| January 18, 2022 | Corcubión. Pr.Cee        | Corcubión | Bivalves | <i>Mytilus galloprovincialis</i> |
| January 27, 2022 | Barqueiro. Pr. Salgueira | Barqueiro | Bivalves | <i>Mytilus galloprovincialis</i> |
| January 25, 2022 | Barallobre. Rampa        | Ferrol    | Bivalves | <i>Mytilus galloprovincialis</i> |
| January 25, 2022 | Miño. Muro Petra Sabio   | Betanzos  | Bivalves | <i>Mytilus galloprovincialis</i> |
| January 25, 2022 | Pasaxe. Sta Cristina     | A Coruña  | Bivalves | <i>Cerastoderma edule</i>        |
| January 25, 2022 | Camariñas. Enseada Vasa  | Camariñas | Bivalves | <i>Mytilus galloprovincialis</i> |
| January 26, 2022 | Corcubión. Pr.Cee        | Corcubión | Bivalves | <i>Mytilus galloprovincialis</i> |
| February 1, 2022 | Barqueiro. Pr. Salgueira | Barqueiro | Bivalves | <i>Mytilus galloprovincialis</i> |
| February 1, 2022 | Barallobre. Rampa        | Ferrol    | Bivalves | <i>Mytilus galloprovincialis</i> |
| February 1, 2022 | Miño. Muro Petra Sabio   | Betanzos  | Bivalves | <i>Mytilus galloprovincialis</i> |
| February 1, 2022 | Pasaxe. Sta Cristina     | A Coruña  | Bivalves | <i>Cerastoderma edule</i>        |
| February 1, 2022 | Camariñas. Enseada Vasa  | Camariñas | Bivalves | <i>Mytilus galloprovincialis</i> |
| February 1, 2022 | Corcubión. Pr.Cee        | Corcubión | Bivalves | <i>Mytilus galloprovincialis</i> |
| February 9, 2022 | Barqueiro. Pr. Salgueira | Barqueiro | Bivalves | <i>Mytilus galloprovincialis</i> |

|                   |                           |            |             |                                  |
|-------------------|---------------------------|------------|-------------|----------------------------------|
| February 8, 2022  | Barallobre. Rampa         | Ferrol     | Bivalves    | <i>Mytilus galloprovincialis</i> |
| February 8, 2022  | Miño. Muro Petra Sabio    | Betanzos   | Bivalves    | <i>Mytilus galloprovincialis</i> |
| February 8, 2022  | Pasaxe. Sta Cristina      | A Coruña   | Bivalves    | <i>Cerastoderma edule</i>        |
| February 8, 2022  | Camariñas. Enseada Vasa   | Camariñas  | Bivalves    | <i>Mytilus galloprovincialis</i> |
| February 8, 2022  | Corcubión. Pr.Cee         | Corcubión  | Bivalves    | <i>Mytilus galloprovincialis</i> |
| February 9, 2022  | Muros III                 | Muros-Noia | Bivalves    | <i>Cerastoderma edule</i>        |
| February 15, 2022 | Barqueiro. Pr. Salgueira  | Barqueiro  | Bivalves    | <i>Mytilus galloprovincialis</i> |
| February 15, 2022 | Barallobre. Rampa         | Ferrol     | Bivalves    | <i>Mytilus galloprovincialis</i> |
| February 15, 2022 | Miño. Muro Petra Sabio    | Betanzos   | Bivalves    | <i>Mytilus galloprovincialis</i> |
| February 15, 2022 | Pasaxe. Sta Cristina      | A Coruña   | Bivalves    | <i>Cerastoderma edule</i>        |
| February 15, 2022 | Camariñas. Enseada Vasa   | Camariñas  | Bivalves    | <i>Mytilus galloprovincialis</i> |
| February 15, 2022 | Corcubión. Pr.Cee         | Corcubión  | Bivalves    | <i>Mytilus galloprovincialis</i> |
| February 14, 2022 | Muros III                 | Muros-Noia | Bivalves    | <i>Cerastoderma edule</i>        |
| February 15, 2022 | Pont V. Placeres          | Pontevedra | Bivalves    | <i>Ruditapes philippinarum</i>   |
| February 21, 2022 | Arousa I.                 | Arousa     | Bivalves    | <i>Aequipecten opercularis</i>   |
| March 2, 2022     | Carnota. Lira             | Corcubión  | Echinoderms | <i>Paracentrotus sp.</i>         |
| March 2, 2022     | Pont V. Placeres          | Pontevedra | Gastropods  | <i>Littorina sp.</i>             |
| March 2, 2022     | Pont V. Placeres          | Pontevedra | Bivalves    | <i>Ostrea edulis</i>             |
| March 2, 2022     | Pont V. Placeres          | Pontevedra | Gastropods  | <i>Patella sp.</i>               |
| March 2, 2022     | Pont V. Placeres          | Pontevedra | Bivalves    | <i>Ruditapes philippinarum</i>   |
| March 2, 2022     | Pont V. Placeres          | Pontevedra | Bivalves    | <i>Mytilus galloprovincialis</i> |
| March 4, 2022     | Vilanova de Arousa. Corón | Arousa     | Bivalves    | <i>Cerastoderma edule</i>        |
| March 4, 2022     | Vilanova de Arousa. Corón | Arousa     | Gastropods  | <i>n.i.</i>                      |
| March 4, 2022     | Vilanova de Arousa. Corón | Arousa     | Crustaceans | <i>Polybius sp.</i>              |
| March 4, 2022     | Vilanova de Arousa. Corón | Arousa     | Bivalves    | <i>Mytilus galloprovincialis</i> |
| March 4, 2022     | Vilanova de Arousa. Corón | Arousa     | Gastropods  | <i>Littorina sp.</i>             |
| March 4, 2022     | Vilanova de Arousa. Corón | Arousa     | Gastropods  | <i>Nucella sp.</i>               |
| March 4, 2022     | Vilanova de Arousa. Corón | Arousa     | Poriferous  | <i>n.i.</i>                      |
| March 4, 2022     | Vilanova de Arousa. Corón | Arousa     | Gastropods  | <i>Nucella sp.</i>               |

|                |                           |            |             |                                  |
|----------------|---------------------------|------------|-------------|----------------------------------|
| March 4, 2022  | Vilanova de Arousa. Corón | Arousa     | Gastropods  | <i>Patella sp.</i>               |
| March 4, 2022  | Vilanova de Arousa. Corón | Arousa     | Gastropods  | <i>Nassarius sp.</i>             |
| March 4, 2022  | Vilanova de Arousa. Corón | Arousa     | Bivalves    | <i>Ruditapes philippinarum</i>   |
| March 4, 2022  | Vilanova de Arousa. Corón | Arousa     | Gastropods  | <i>Monodonta sp.</i>             |
| March 4, 2022  | Vilanova de Arousa. Corón | Arousa     | Crustaceans | <i>Balanus sp.</i>               |
| March 4, 2022  | Vilanova de Arousa. Corón | Arousa     | Cnidarias   | <i>n.i.</i>                      |
| March 4, 2022  | Porto do Son. Arnela      | Muros-Noia | Bivalves    | <i>Mytilus galloprovincialis</i> |
| March 4, 2022  | Porto do Son. Arnela      | Muros-Noia | Gastropods  | <i>Patella sp.</i>               |
| March 4, 2022  | Porto do Son. Arnela      | Muros-Noia | Crustaceans | <i>Balanus sp.</i>               |
| March 4, 2022  | Porto do Son. Arnela      | Muros-Noia | Cnidarias   | <i>n.i.</i>                      |
| March 4, 2022  | Porto do Son. Arnela      | Muros-Noia | Cnidarias   | <i>n.i.</i>                      |
| March 4, 2022  | Porto do Son. Arnela      | Muros-Noia | Polychaetes | <i>n.i.</i>                      |
| March 4, 2022  | Porto do Son. Arnela      | Muros-Noia | Gastropods  | <i>Monodonta sp.</i>             |
| March 4, 2022  | Porto do Son. Arnela      | Muros-Noia | Gastropods  | <i>Gibbula sp.</i>               |
| March 4, 2022  | Porto do Son. Arnela      | Muros-Noia | Gastropods  | <i>Nucella sp.</i>               |
| April 8, 2022  | Nigrán. Patos             | Vigo       | Gastropods  | <i>Monodonta sp.</i>             |
| April 8, 2022  | Nigrán. Patos             | Vigo       | Gastropods  | <i>Patella sp.</i>               |
| April 8, 2022  | Nigrán. Patos             | Vigo       | Gastropods  | <i>n.i.</i>                      |
| April 6, 2022  | Arousa. Bohido            | Arousa     | Bivalves    | <i>Venus verrucosa</i>           |
| April 6, 2022  | Arousa. Bohido            | Arousa     | Bivalves    | <i>Dosinia exoleta</i>           |
| April 18, 2022 | Porto do Son. Arnela      | Muros-Noia | Gastropods  | <i>Nucella sp.</i>               |
| April 18, 2022 | Porto do Son. Arnela      | Muros-Noia | Gastropods  | <i>Monodonta sp.</i>             |
| April 18, 2022 | Porto do Son. Arnela      | Muros-Noia | Gastropods  | <i>Gibbula sp.</i>               |
| April 18, 2022 | Porto do Son. Arnela      | Muros-Noia | Echinoderms | <i>Asterina sp.</i>              |
| April 18, 2022 | Porto do Son. Arnela      | Muros-Noia | Gastropods  | <i>Patella sp.</i>               |
| April 18, 2022 | Porto do Son. Arnela      | Muros-Noia | Echinoderms | <i>Paracentrotus sp.</i>         |
| April 18, 2022 | Porto do Son. Arnela      | Muros-Noia | Cnidarias   | <i>n.i.</i>                      |
| April 18, 2022 | Porto do Son. Arnela      | Muros-Noia | Bivalves    | <i>Mytilus galloprovincialis</i> |
| April 18, 2022 | Porto do Son. Arnela      | Muros-Noia | Polychaetes | <i>n.i.</i>                      |

|                |                           |            |             |                                  |
|----------------|---------------------------|------------|-------------|----------------------------------|
| April 19, 2022 | Vilanova de Arousa. Corón | Arousa     | Crustaceans | <i>Polybius sp.</i>              |
| April 19, 2022 | Vilanova de Arousa. Corón | Arousa     | Bivalves    | <i>Cerastoderma edule</i>        |
| April 19, 2022 | Vilanova de Arousa. Corón | Arousa     | Bivalves    | <i>Ruditapes philippinarum</i>   |
| April 19, 2022 | Vilanova de Arousa. Corón | Arousa     | Gastropods  | <i>Littorina sp.</i>             |
| April 19, 2022 | Vilanova de Arousa. Corón | Arousa     | Cnidarias   | <i>n.i.</i>                      |
| April 19, 2022 | Vilanova de Arousa. Corón | Arousa     | Bivalves    | <i>Mytilus galloprovincialis</i> |
| April 19, 2022 | Vilanova de Arousa. Corón | Arousa     | Gastropods  | <i>Patella sp.</i>               |
| April 19, 2022 | Vilanova de Arousa. Corón | Arousa     | Crustaceans | <i>Balanus sp.</i>               |
| April 19, 2022 | Vilanova de Arousa. Corón | Arousa     | Gastropods  | <i>Monodonta sp.</i>             |
| April 19, 2022 | Vilanova de Arousa. Corón | Arousa     | Gastropods  | <i>Nassarius sp.</i>             |
| April 19, 2022 | Vilanova de Arousa. Corón | Arousa     | Gastropods  | <i>Ocenebra sp.</i>              |
| April 19, 2022 | Vilanova de Arousa. Corón | Arousa     | Gastropods  | <i>Nucella sp.</i>               |
| April 19, 2022 | Carnota. Lira             | Corcubión  | Echinoderms | <i>Paracentrotus sp.</i>         |
| April 19, 2022 | Aldán. Vilariño           | Pontevedra | Gastropods  | <i>Crepidula sp.</i>             |
| April 19, 2022 | Aldán. Vilariño           | Pontevedra | Gastropods  | <i>Monodonta sp.</i>             |
| April 19, 2022 | Aldán. Vilariño           | Pontevedra | Gastropods  | <i>Nucella sp.</i>               |
| April 19, 2022 | Aldán. Vilariño           | Pontevedra | Crustaceans | <i>Polybius sp.</i>              |
| April 19, 2022 | Aldán. Vilariño           | Pontevedra | Cnidarias   | <i>n.i.</i>                      |
| April 19, 2022 | Aldán. Vilariño           | Pontevedra | Cnidarias   | <i>n.i.</i>                      |
| April 19, 2022 | Aldán. Vilariño           | Pontevedra | Gastropods  | <i>Patella sp.</i>               |
| April 19, 2022 | Aldán. Vilariño           | Pontevedra | Bivalves    | <i>Mytilus galloprovincialis</i> |
| April 19, 2022 | Bueu. Beluso              | Pontevedra | Gastropods  | <i>Patella sp.</i>               |
| April 19, 2022 | Bueu. Beluso              | Pontevedra | Cnidarias   | <i>n.i.</i>                      |
| April 19, 2022 | Bueu. Beluso              | Pontevedra | Bivalves    | <i>Mytilus galloprovincialis</i> |
| April 19, 2022 | Bueu. Beluso              | Pontevedra | Gastropods  | <i>Crepidula sp.</i>             |
| April 19, 2022 | Bueu. Beluso              | Pontevedra | Gastropods  | <i>Monodonta sp.</i>             |
| April 21, 2022 | Pont V. Placeres          | Pontevedra | Gastropods  | <i>Monodonta sp.</i>             |
| April 21, 2022 | Pont V. Placeres          | Pontevedra | Gastropods  | <i>Littorina sp.</i>             |
| April 21, 2022 | Pont V. Placeres          | Pontevedra | Gastropods  | <i>Patella sp.</i>               |



|                   |                          |            |             |                                  |
|-------------------|--------------------------|------------|-------------|----------------------------------|
| April 21, 2022    | Pont V. Placeres         | Pontevedra | Crustaceans | <i>Polybius sp.</i>              |
| April 21, 2022    | Pont V. Placeres         | Pontevedra | Bivalves    | <i>Mytilus galloprovincialis</i> |
| May 2, 2022       | Carnota. Lira            | Corcubión  | Echinoderms | <i>Paracentrotus sp.</i>         |
| May 2, 2022       | Arousa. Bohido           | Arousa     | Bivalves    | <i>Ruditapes philippinarum</i>   |
| May 2, 2022       | Carnota. Lira            | Corcubión  | Gastropods  | <i>Patella ulyssiponensi</i>     |
| May 2, 2022       | Carnota. Lira            | Corcubión  | Gastropods  | <i>Patella vulgata</i>           |
| May 2, 2022       | Carnota. Lira            | Corcubión  | Gastropods  | <i>Haliotis tuberculata</i>      |
| May 2, 2022       | Carnota. Lira            | Corcubión  | Echinoderms | <i>Holothuria forskali</i>       |
| May 2, 2022       | Carnota. Lira            | Corcubión  | Echinoderms | <i>Marthasterias glacialis</i>   |
| February 23, 2022 | Barqueiro. Pr. Salgueira | Barqueiro  | Bivalves    | <i>Mytilus galloprovincialis</i> |
| February 23, 2022 | Barallobre. Rampa        | Ferrol     | Bivalves    | <i>Mytilus galloprovincialis</i> |
| February 22, 2022 | Miño. Muro Petra Sabio   | Betanzos   | Bivalves    | <i>Mytilus galloprovincialis</i> |
| February 22, 2022 | Pasaxe. Sta Cristina     | A Coruña   | Bivalves    | <i>Cerastoderma edule</i>        |
| February 22, 2022 | Camariñas. Enseada Vasa  | Camariñas  | Bivalves    | <i>Mytilus galloprovincialis</i> |
| February 22, 2022 | Corcubión. Pr.Cee        | Corcubión  | Bivalves    | <i>Mytilus galloprovincialis</i> |
| February 22, 2022 | Muros III. Testal        | Muros-Noia | Bivalves    | <i>Cerastoderma edule</i>        |
| March 1, 2022     | Barqueiro. Pr. Salgueira | Barqueiro  | Bivalves    | <i>Mytilus galloprovincialis</i> |
| March 2, 2022     | Barallobre. Rampa        | Ferrol     | Bivalves    | <i>Mytilus galloprovincialis</i> |
| March 1, 2022     | Miño. Muro Petra Sabio   | Betanzos   | Bivalves    | <i>Mytilus galloprovincialis</i> |
| March 1, 2022     | Pasaxe. Sta Cristina     | A Coruña   | Bivalves    | <i>Cerastoderma edule</i>        |
| March 1, 2022     | Camariñas. Enseada Vasa  | Camariñas  | Bivalves    | <i>Mytilus galloprovincialis</i> |
| March 2, 2022     | Corcubión. Pr.Cee        | Corcubión  | Bivalves    | <i>Cerastoderma edule</i>        |
| March 8, 2022     | Barqueiro. Pr. Salgueira | Barqueiro  | Bivalves    | <i>Mytilus galloprovincialis</i> |
| March 9, 2022     | Barallobre. Rampa        | Ferrol     | Bivalves    | <i>Mytilus galloprovincialis</i> |
| March 8, 2022     | Miño. Muro Petra Sabio   | Betanzos   | Bivalves    | <i>Mytilus galloprovincialis</i> |
| March 8, 2022     | Pasaxe. Sta Cristina     | A Coruña   | Bivalves    | <i>Cerastoderma edule</i>        |
| March 8, 2022     | Camariñas. Enseada Vasa  | Camariñas  | Bivalves    | <i>Mytilus galloprovincialis</i> |
| March 8, 2022     | Corcubión. Pr.Cee        | Corcubión  | Bivalves    | <i>Mytilus galloprovincialis</i> |
| March 15, 2022    | Barallobre. Rampa        | Ferrol     | Bivalves    | <i>Mytilus galloprovincialis</i> |

|                |                          |            |          |                                  |
|----------------|--------------------------|------------|----------|----------------------------------|
| March 17, 2022 | Miño. Muro Petra Sabio   | Betanzos   | Bivalves | <i>Mytilus galloprovincialis</i> |
| March 17, 2022 | Camariñas. Enseada Vasa  | Camariñas  | Bivalves | <i>Mytilus galloprovincialis</i> |
| March 24, 2022 | Barqueiro. Pr. Salgueira | Barqueiro  | Bivalves | <i>Mytilus galloprovincialis</i> |
| March 25, 2022 | Barallobre. Rampa        | Ferrol     | Bivalves | <i>Mytilus galloprovincialis</i> |
| March 22, 2022 | Miño. Muro Petra Sabio   | Betanzos   | Bivalves | <i>Mytilus galloprovincialis</i> |
| March 22, 2022 | Camariñas. Enseada Vasa  | Camariñas  | Bivalves | <i>Mytilus galloprovincialis</i> |
| March 23, 2022 | Corcubión. Pr.Cee        | Corcubión  | Bivalves | <i>Mytilus galloprovincialis</i> |
| March 30, 2022 | Barqueiro. Pr. Salgueira | Barqueiro  | Bivalves | <i>Mytilus galloprovincialis</i> |
| March 29, 2022 | Barallobre. Rampa        | Ferrol     | Bivalves | <i>Mytilus galloprovincialis</i> |
| March 29, 2022 | Miño. Muro Petra Sabio   | Betanzos   | Bivalves | <i>Mytilus galloprovincialis</i> |
| March 29, 2022 | Pasaxe. Sta Cristina     | A Coruña   | Bivalves | <i>Cerastoderma edule</i>        |
| March 29, 2022 | Camariñas. Enseada Vasa  | Camariñas  | Bivalves | <i>Mytilus galloprovincialis</i> |
| March 31, 2022 | Corcubión. Pr.Cee        | Corcubión  | Bivalves | <i>Mytilus galloprovincialis</i> |
| March 30, 2022 | Muros III                | Muros-Noia | Bivalves | <i>Cerastoderma edule</i>        |
| April 5, 2022  | Barqueiro. Pr. Salgueira | Barqueiro  | Bivalves | <i>Mytilus galloprovincialis</i> |
| April 5, 2022  | Barallobre. Rampa        | Ferrol     | Bivalves | <i>Mytilus galloprovincialis</i> |
| April 5, 2022  | Miño. Muro Petra Sabio   | Betanzos   | Bivalves | <i>Mytilus galloprovincialis</i> |
| April 5, 2022  | Pasaxe. Sta Cristina     | A Coruña   | Bivalves | <i>Cerastoderma edule</i>        |
| April 5, 2022  | Camariñas. Enseada Vasa  | Camariñas  | Bivalves | <i>Mytilus galloprovincialis</i> |
| April 5, 2022  | Muros I                  | Muros-Noia | Bivalves | <i>Ensis ensis</i>               |
| April 4, 2022  | Muros III. Testal        | Muros-Noia | Bivalves | <i>Cerastoderma edule</i>        |
| April 5, 2022  | Pont II                  | Pontevedra | Bivalves | <i>Ensis ensis</i>               |
| April 6, 2022  | Camariñas. Enseada Vasa  | Camariñas  | Bivalves | <i>Ruditapes decussatus</i>      |
| April 6, 2022  | Corcubión. Pr.Cee        | Corcubión  | Bivalves | <i>Mytilus galloprovincialis</i> |
| April 6, 2022  | Muros I                  | Muros-Noia | Bivalves | <i>Cerastoderma edule</i>        |
| April 6, 2022  | Muros III                | Muros-Noia | Bivalves | <i>Cerastoderma edule</i>        |
| April 12, 2022 | Barallobre. Rampa        | Ferrol     | Bivalves | <i>Cerastoderma edule</i>        |
| April 12, 2022 | Miño. Lombo Espiñeira    | Betanzos   | Bivalves | <i>Cerastoderma edule</i>        |
| April 12, 2022 | Pasaxe. Sta Cristina     | A Coruña   | Bivalves | <i>Cerastoderma edule</i>        |

|                |                          |            |          |                                  |
|----------------|--------------------------|------------|----------|----------------------------------|
| April 12, 2022 | Muros I. Cabeiro         | Muros-Noia | Bivalves | <i>Ensis ensis</i>               |
| April 11, 2022 | Muros III. Testal        | Muros-Noia | Bivalves | <i>Cerastoderma edule</i>        |
| April 13, 2022 | Barqueiro. Pr. Salgueira | Barqueiro  | Bivalves | <i>Cerastoderma edule</i>        |
| April 13, 2022 | Camariñas. Enseada Vasa  | Camariñas  | Bivalves | <i>Ruditapes decussatus</i>      |
| April 13, 2022 | Corcubión. Pr.Cee        | Corcubión  | Bivalves | <i>Cerastoderma edule</i>        |
| April 13, 2022 | Muros I. Abelleira       | Muros-Noia | Bivalves | <i>Cerastoderma edule</i>        |
| April 19, 2022 | Barqueiro. Pr. Salgueira | Barqueiro  | Bivalves | <i>Mytilus galloprovincialis</i> |
| April 19, 2022 | Barallobre. Rampa        | Ferrol     | Bivalves | <i>Mytilus galloprovincialis</i> |
| April 19, 2022 | Miño. Muro Petra Sabio   | Betanzos   | Bivalves | <i>Mytilus galloprovincialis</i> |
| April 20, 2022 | Pasaxe. Sta Cristina     | A Coruña   | Bivalves | <i>Cerastoderma edule</i>        |
| April 19, 2022 | Camariñas. Enseada Vasa  | Camariñas  | Bivalves | <i>Ruditapes decussatus</i>      |
| April 20, 2022 | Corcubión. Pr.Cee        | Corcubión  | Bivalves | <i>Mytilus galloprovincialis</i> |
| April 19, 2022 | Muros I                  | Muros-Noia | Bivalves | <i>Ensis ensis</i>               |
| April 18, 2022 | Muros III. Testal        | Muros-Noia | Bivalves | <i>Cerastoderma edule</i>        |
| April 22, 2022 | Arousa I.                | Arousa     | Bivalves | <i>Venerupis rhomboides</i>      |
| April 21, 2022 | Pont II                  | Pontevedra | Bivalves | <i>Ensis ensis</i>               |
| April 22, 2022 | Pont V                   | Pontevedra | Bivalves | <i>Ruditapes philippinarum</i>   |
| April 21, 2022 | Vigo II.2                | Vigo       | Bivalves | <i>Ruditapes philippinarum</i>   |
| April 26, 2022 | Barqueiro. Pr. Salgueira | Barqueiro  | Bivalves | <i>Mytilus galloprovincialis</i> |
| April 26, 2022 | Barallobre. Rampa        | Ferrol     | Bivalves | <i>Mytilus galloprovincialis</i> |
| April 26, 2022 | Miño. Muro Petra Sabio   | Betanzos   | Bivalves | <i>Mytilus galloprovincialis</i> |
| April 27, 2022 | Pasaxe. Sta Cristina     | A Coruña   | Bivalves | <i>Cerastoderma edule</i>        |
| April 26, 2022 | Camariñas. Enseada Vasa  | Camariñas  | Bivalves | <i>Mytilus galloprovincialis</i> |
| April 26, 2022 | Corcubión. Pr.Cee        | Corcubión  | Bivalves | <i>Mytilus galloprovincialis</i> |
| April 27, 2022 | Muros I                  | Muros-Noia | Bivalves | <i>Cerastoderma edule</i>        |
| April 29, 2022 | Arousa I.                | Arousa     | Bivalves | <i>Ruditapes philippinarum</i>   |
| April 28, 2022 | Pont II                  | Pontevedra | Bivalves | <i>Ensis ensis</i>               |
| April 28, 2022 | Pont V                   | Pontevedra | Bivalves | <i>Ruditapes philippinarum</i>   |
| April 29, 2022 | Barallobre. Rampa        | Ferrol     | Bivalves | <i>Ruditapes philippinarum</i>   |

|               |                          |            |             |                                    |
|---------------|--------------------------|------------|-------------|------------------------------------|
| May 3, 2022   | Barqueiro. Pr. Salgueira | Barqueiro  | Bivalves    | <i>Magallana gigas</i>             |
| May 3, 2022   | Barallobre. Maniños      | Ferrol     | Bivalves    | <i>Ruditapes philippinarum</i>     |
| May 3, 2022   | Miño. Lombo Espiñeira    | Betanzos   | Bivalves    | <i>Ruditapes philippinarum</i>     |
| May 4, 2022   | Pasaxe. Sta Cristina     | A Coruña   | Bivalves    | <i>Cerastoderma edule</i>          |
| May 3, 2022   | Camariñas. Enseada Vasa  | Camariñas  | Bivalves    | <i>Ruditapes decussatus</i>        |
| May 4, 2022   | Corcubión. Pr.Cee        | Corcubión  | Bivalves    | <i>Mytilus galloprovincialis</i>   |
| May 3, 2022   | Muros I                  | Muros-Noia | Bivalves    | <i>Cerastoderma edule</i>          |
| May 4, 2022   | Pont V                   | Pontevedra | Bivalves    | <i>Ensis ensis</i>                 |
| May 5, 2022   | Pont V                   | Pontevedra | Bivalves    | <i>Ruditapes philippinarum</i>     |
| May 11, 2022  | Barqueiro. Pr. Salgueira | Barqueiro  | Bivalves    | <i>Magallana gigas</i>             |
| May 10, 2022  | Barallobre. Maniños      | Ferrol     | Bivalves    | <i>Cerastoderma edule</i>          |
| May 11, 2022  | Miño. Lombo Espiñeira    | Betanzos   | Bivalves    | <i>Ruditapes philippinarum</i>     |
| May 12, 2022  | Pasaxe. Sta Cristina     | A Coruña   | Bivalves    | <i>Cerastoderma edule</i>          |
| May 11, 2022  | Camariñas. Enseada Vasa  | Camariñas  | Bivalves    | <i>Ruditapes decussatus</i>        |
| May 10, 2022  | Corcubión. Pr.Cee        | Corcubión  | Bivalves    | <i>Cerastoderma edule</i>          |
| May 12, 2022  | Pont V. Placeres         | Pontevedra | Bivalves    | <i>Venerupis pullastra</i>         |
| May 12, 2022  | Vigo II.2 Xunqueira      | Vigo       | Gastropods  | <i>Haliotis sp.</i>                |
| May 26, 2022  | <i>Carnota. Lira</i>     | Corcubión  | Echinoderms | <i>Paracentrotus sp.</i>           |
| May 24, 2022  | Arousa. Bohido           | Arousa     | Echinoderms | <i>Asterina gibbosa</i>            |
| May 24, 2022  | Arousa. Bohido           | Arousa     | Echinoderms | <i>Paracentrotus lividus</i>       |
| May 24, 2022  | Arousa. Bohido           | Arousa     | Cnidarias   | <i>Calliactis parasitica</i>       |
| May 24, 2022  | Arousa. Bohido           | Arousa     | Crustaceans | <i>Nécora puber</i>                |
| May 24, 2022  | Arousa. Bohido           | Arousa     | Crustaceans | <i>Liocarcinus corrugatus</i>      |
| May 24, 2022  | Arousa. Bohido           | Arousa     | Crustaceans | <i>Liocarcinus arcuatus</i>        |
| May 24, 2022  | Arousa. Bohido           | Arousa     | Gastropods  | <i>Nassarius reticulatus</i>       |
| May 24, 2022  | Arousa. Bohido           | Arousa     | Crustaceans | <i>Atelecyclus undecimdentatus</i> |
| June 14, 2022 | Porto do Son. Arnela     | Muros-Noia | Polychaetes | <i>n.i.</i>                        |
| June 14, 2022 | Porto do Son. Arnela     | Muros-Noia | Gastropods  | <i>Shiponaria pectinata</i>        |
| June 14, 2022 | Porto do Son. Arnela     | Muros-Noia | Bivalves    | <i>Mytilus galloprovincialis</i>   |

|               |                           |            |             |                                  |
|---------------|---------------------------|------------|-------------|----------------------------------|
| June 14, 2022 | Porto do Son. Arnela      | Muros-Noia | Crustaceans | <i>Balanus sp.</i>               |
| June 14, 2022 | Porto do Son. Arnela      | Muros-Noia | Echinoderms | <i>Asterina sp.</i>              |
| June 14, 2022 | Porto do Son. Arnela      | Muros-Noia | Cnidarias   | <i>n.i.</i>                      |
| June 14, 2022 | Porto do Son. Arnela      | Muros-Noia | Gastropods  | <i>Nucella sp.</i>               |
| June 14, 2022 | Porto do Son. Arnela      | Muros-Noia | Gastropods  | <i>Patella sp.</i>               |
| June 14, 2022 | Porto do Son. Arnela      | Muros-Noia | Gastropods  | <i>Monodonta sp.</i>             |
| June 14, 2022 | Vilanova de Arousa. Corón | Arousa     | Cnidarias   | <i>n.i.</i>                      |
| June 14, 2022 | Vilanova de Arousa. Corón | Arousa     | Gastropods  | <i>Nassarius sp.</i>             |
| June 14, 2022 | Vilanova de Arousa. Corón | Arousa     | Gastropods  | <i>Monodonta sp.</i>             |
| June 14, 2022 | Vilanova de Arousa. Corón | Arousa     | Gastropods  | <i>Gibbula sp.</i>               |
| June 14, 2022 | Vilanova de Arousa. Corón | Arousa     | Crustaceans | <i>Polybius sp.</i>              |
| June 14, 2022 | Vilanova de Arousa. Corón | Arousa     | Bivalves    | <i>Ostrea edulis</i>             |
| June 14, 2022 | Vilanova de Arousa. Corón | Arousa     | Crustaceans | <i>Balanus sp.</i>               |
| June 14, 2022 | Vilanova de Arousa. Corón | Arousa     | Gastropods  | <i>Patella sp.</i>               |
| June 14, 2022 | Vilanova de Arousa. Corón | Arousa     | Bivalves    | <i>Mytilus galloprovincialis</i> |
| June 14, 2022 | Vilanova de Arousa. Corón | Arousa     | Gastropods  | <i>Nucella sp.</i>               |
| June 14, 2022 | Vilanova de Arousa. Corón | Arousa     | Gastropods  | <i>Littorina sp.</i>             |
| June 14, 2022 | Vilanova de Arousa. Corón | Arousa     | Gastropods  | <i>Doris verrucosa</i>           |
| June 14, 2022 | Bueu. Beluso              | Pontevedra | Gastropods  | <i>Patella sp.</i>               |
| June 14, 2022 | Bueu. Beluso              | Pontevedra | Bivalves    | <i>Mytilus galloprovincialis</i> |
| June 14, 2022 | Bueu. Beluso              | Pontevedra | Gastropods  | <i>Monodonta sp.</i>             |
| June 14, 2022 | Bueu. Beluso              | Pontevedra | Cnidarias   | <i>n.i.</i>                      |
| June 14, 2022 | Aldán. Vilariño           | Pontevedra | Gastropods  | <i>Littorina sp.</i>             |
| June 14, 2022 | Aldán. Vilariño           | Pontevedra | Gastropods  | <i>Patella sp.</i>               |
| June 14, 2022 | Aldán. Vilariño           | Pontevedra | Gastropods  | <i>Monodonta sp.</i>             |
| June 14, 2022 | Aldán. Vilariño           | Pontevedra | Crustaceans | <i>Polybius sp.</i>              |
| June 14, 2022 | Aldán. Vilariño           | Pontevedra | Cnidarias   | <i>n.i.</i>                      |
| June 14, 2022 | Aldán. Vilariño           | Pontevedra | Bivalves    | <i>Mytilus galloprovincialis</i> |
| June 14, 2022 | Aldán. Vilariño           | Pontevedra | Cnidarias   | <i>n.i.</i>                      |

|               |                          |            |             |                                  |
|---------------|--------------------------|------------|-------------|----------------------------------|
| June 17, 2022 | Ramallosa. Esteiro Foz   | Vigo       | Gastropods  | <i>Patella sp.</i>               |
| June 17, 2022 | Ramallosa. Esteiro Foz   | Vigo       | Bivalves    | <i>Mytilus galloprovincialis</i> |
| June 17, 2022 | Ramallosa. Esteiro Foz   | Vigo       | Bivalves    | <i>Cerastoderma edule</i>        |
| June 17, 2022 | Ramallosa. Esteiro Foz   | Vigo       | Bivalves    | <i>Ruditapes decussatus</i>      |
| June 17, 2022 | Ramallosa. Esteiro Foz   | Vigo       | Gastropods  | <i>Littorina sp.</i>             |
| June 17, 2022 | Ramallosa. Esteiro Foz   | Vigo       | Crustaceans | <i>Carcinus maenas</i>           |
| June 21, 2022 | Pont V. Placeres         | Pontevedra | Gastropods  | <i>Littorina sp.</i>             |
| June 21, 2022 | Pont V. Placeres         | Pontevedra | Bivalves    | <i>Mytilus galloprovincialis</i> |
| June 21, 2022 | Pont V. Placeres         | Pontevedra | Gastropods  | <i>Gibbula sp.</i>               |
| June 21, 2022 | Pont V. Placeres         | Pontevedra | Crustaceans | <i>Polybius sp.</i>              |
| June 21, 2022 | Pont V. Placeres         | Pontevedra | Gastropods  | <i>Patella sp.</i>               |
| June 21, 2022 | Pont V. Placeres         | Pontevedra | Gastropods  | <i>Monodonta sp.</i>             |
| July 19, 2022 | Camariñas. Enseada Vasa  | Camariñas  | Gastropods  | <i>Nassarius sp.</i>             |
| July 19, 2022 | Camariñas. Enseada Vasa  | Camariñas  | Gastropods  | <i>Patella sp.</i>               |
| July 19, 2022 | Camariñas. Enseada Vasa  | Camariñas  | Bivalves    | <i>Magallana gigas</i>           |
| July 19, 2022 | Camariñas. Enseada Vasa  | Camariñas  | Bivalves    | <i>Mytilus galloprovincialis</i> |
| July 19, 2022 | Camariñas. Enseada Vasa  | Camariñas  | Cnidarias   | <i>n.i.</i>                      |
| July 19, 2022 | Camariñas. Paxariñas     | Camariñas  | Bivalves    | <i>Mytilus galloprovincialis</i> |
| July 19, 2022 | Camariñas. Paxariñas     | Camariñas  | Crustaceans | <i>Polybius sp.</i>              |
| July 19, 2022 | Camariñas. Paxariñas     | Camariñas  | Gastropods  | <i>Littorina sp.</i>             |
| May 18, 2022  | Barqueiro. Pr. Salgueira | Barqueiro  | Bivalves    | <i>Magallana gigas</i>           |
| May 18, 2022  | Barallobre. Maniños      | Ferrol     | Bivalves    | <i>Cerastoderma edule</i>        |
| May 18, 2022  | Miño. Lombo Espiñeira    | Betanzos   | Bivalves    | <i>Ruditapes philippinarum</i>   |
| May 18, 2022  | Pasaxe. Sta Cristina     | A Coruña   | Bivalves    | <i>Cerastoderma edule</i>        |
| May 18, 2022  | Camariñas. Enseada Vasa  | Camariñas  | Bivalves    | <i>Ruditapes decussatus</i>      |
| May 19, 2022  | Corcubión. Pr.Cee        | Corcubión  | Bivalves    | <i>Cerastoderma edule</i>        |
| May 25, 2022  | Barqueiro. Pr. Salgueira | Barqueiro  | Bivalves    | <i>Magallana gigas</i>           |
| May 26, 2022  | Barallobre. Maniños      | Ferrol     | Bivalves    | <i>Cerastoderma edule</i>        |
| May 24, 2022  | Miño. Lombo Espiñeira    | Betanzos   | Bivalves    | <i>Ruditapes philippinarum</i>   |

|               |                          |           |            |                                  |
|---------------|--------------------------|-----------|------------|----------------------------------|
| May 24, 2022  | Pasaxe. Sta Cristina     | A Coruña  | Bivalves   | <i>Cerastoderma edule</i>        |
| May 25, 2022  | Camariñas. Enseada Vasa  | Camariñas | Bivalves   | <i>Ruditapes philippinarum</i>   |
| May 25, 2022  | Corcubión. Pr.Cee        | Corcubión | Bivalves   | <i>Cerastoderma edule</i>        |
| May 25, 2022  | Vigo I                   | Vigo      | Bivalves   | <i>Aequipecten opercularis</i>   |
| May 24, 2022  | Vigo II                  | Vigo      | Gastropods | <i>Haliotis sp.</i>              |
| June 1, 2022  | Barqueiro. Pr. Salgueira | Barqueiro | Bivalves   | <i>Magallana gigas</i>           |
| June 1, 2022  | Barallobre. Maniños      | Ferrol    | Bivalves   | <i>Cerastoderma edule</i>        |
| May 31, 2022  | Miño. Lombo Espiñeira    | Betanzos  | Bivalves   | <i>Ruditapes philippinarum</i>   |
| June 1, 2022  | Pasaxe. Sta Cristina     | A Coruña  | Bivalves   | <i>Cerastoderma edule</i>        |
| May 31, 2022  | Camariñas. Enseada Vasa  | Camariñas | Bivalves   | <i>Ruditapes philippinarum</i>   |
| June 1, 2022  | Corcubión. Pr.Cee        | Corcubión | Bivalves   | <i>Mytilus galloprovincialis</i> |
| June 9, 2022  | Barqueiro. Pr. Salgueira | Barqueiro | Bivalves   | <i>Mytilus galloprovincialis</i> |
| June 8, 2022  | Barallobre. Rampa        | Ferrol    | Bivalves   | <i>Mytilus galloprovincialis</i> |
| June 7, 2022  | Miño. Lombo Espiñeira    | Betanzos  | Bivalves   | <i>Ruditapes philippinarum</i>   |
| June 7, 2022  | Pasaxe. Sta Cristina     | A Coruña  | Bivalves   | <i>Cerastoderma edule</i>        |
| June 7, 2022  | Camariñas. Enseada Vasa  | Camariñas | Bivalves   | <i>Ruditapes philippinarum</i>   |
| June 7, 2022  | Corcubión. Pr.Cee        | Corcubión | Bivalves   | <i>Mytilus galloprovincialis</i> |
| June 14, 2022 | Barqueiro. Pr. Salgueira | Barqueiro | Bivalves   | <i>Mytilus galloprovincialis</i> |
| June 14, 2022 | Barallobre. Rampa        | Ferrol    | Bivalves   | <i>Mytilus galloprovincialis</i> |
| June 14, 2022 | Miño. Lombo Espiñeira    | Betanzos  | Bivalves   | <i>Ruditapes philippinarum</i>   |
| June 14, 2022 | Pasaxe. Sta Cristina     | A Coruña  | Bivalves   | <i>Cerastoderma edule</i>        |
| June 14, 2022 | Camariñas. Enseada Vasa  | Camariñas | Bivalves   | <i>Ruditapes philippinarum</i>   |
| June 14, 2022 | Corcubión. Pr.Cee        | Corcubión | Bivalves   | <i>Mytilus galloprovincialis</i> |
| June 14, 2022 | Camariñas. Zona E        | Camariñas | Bivalves   | <i>Ensis ensis</i>               |
| June 23, 2022 | Barqueiro. Pr. Salgueira | Barqueiro | Bivalves   | <i>Mytilus galloprovincialis</i> |
| June 21, 2022 | Barallobre. Pantalán     | Ferrol    | Bivalves   | <i>Mytilus galloprovincialis</i> |
| June 21, 2022 | Miño. Lombo Espiñeira    | Betanzos  | Bivalves   | <i>Ruditapes philippinarum</i>   |
| June 22, 2022 | Pasaxe. Sta Cristina     | A Coruña  | Bivalves   | <i>Cerastoderma edule</i>        |
| June 21, 2022 | Camariñas. Paxariñas     | Camariñas | Bivalves   | <i>Ruditapes philippinarum</i>   |

|               |                          |            |            |                                  |
|---------------|--------------------------|------------|------------|----------------------------------|
| June 21, 2022 | Pont II. Menduiña        | Pontevedra | Bivalves   | <i>Ensis ensis</i>               |
| June 21, 2022 | Camariñas. Zona E        | Camariñas  | Bivalves   | <i>Ensis ensis</i>               |
| June 28, 2022 | Barqueiro. Pr. Salgueira | Barqueiro  | Bivalves   | <i>Mytilus galloprovincialis</i> |
| June 29, 2022 | Barallobre. Rampa        | Ferrol     | Bivalves   | <i>Mytilus galloprovincialis</i> |
| June 28, 2022 | Miño. Lombo Espiñeira    | Betanzos   | Bivalves   | <i>Ruditapes philippinarum</i>   |
| June 28, 2022 | Camariñas. Enseada Vasa  | Camariñas  | Bivalves   | <i>Ruditapes philippinarum</i>   |
| June 29, 2022 | Corcubión. Pr.Cee        | Corcubión  | Bivalves   | <i>Mytilus galloprovincialis</i> |
| June 30, 2022 | Muros I. Cabeiro         | Muros-Noia | Bivalves   | <i>Ensis ensis</i>               |
| July 1, 2022  | Muros I. Pr. da Virxen   | Muros-Noia | Bivalves   | <i>Cerastoderma edule</i>        |
| June 30, 2022 | Pont II. San Cibrao      | Pontevedra | Bivalves   | <i>Ruditapes philippinarum</i>   |
| June 30, 2022 | Vigo I. Subrido          | Vigo       | Gastropods | <i>Haliotis sp.</i>              |
| July 6, 2022  | Barqueiro. Pr. Salgueira | Barqueiro  | Bivalves   | <i>Mytilus galloprovincialis</i> |
| July 5, 2022  | Barallobre. Rampa        | Ferrol     | Bivalves   | <i>Mytilus galloprovincialis</i> |
| July 5, 2022  | Miño. Lombo Espiñeira    | Betanzos   | Bivalves   | <i>Ruditapes philippinarum</i>   |
| July 6, 2022  | Pasaxe. Sta Cristina     | A Coruña   | Bivalves   | <i>Cerastoderma edule</i>        |
| July 5, 2022  | Camariñas. Enseada Vasa  | Camariñas  | Bivalves   | <i>Ruditapes decussatus</i>      |
| July 5, 2022  | Muros I. Abelleira       | Muros-Noia | Bivalves   | <i>Cerastoderma edule</i>        |
| July 5, 2022  | Muros I. Esteiro         | Muros-Noia | Bivalves   | <i>Ensis ensis</i>               |
| July 5, 2022  | Pont II. Niño do corvo   | Pontevedra | Bivalves   | <i>Ensis ensis</i>               |
| July 7, 2022  | Pont V                   | Pontevedra | Bivalves   | <i>Ruditapes philippinarum</i>   |
| July 12, 2022 | Barqueiro. San Fiz       | Barqueiro  | Bivalves   | <i>Cerastoderma edule</i>        |
| July 12, 2022 | Barallobre. Rampa        | Ferrol     | Bivalves   | <i>Mytilus galloprovincialis</i> |
| July 12, 2022 | Miño. Lombo Espiñeira    | Betanzos   | Bivalves   | <i>Ruditapes philippinarum</i>   |
| July 12, 2022 | Camariñas. Enseada Vasa  | Camariñas  | Bivalves   | <i>Ruditapes philippinarum</i>   |
| July 12, 2022 | Muros I. Pr. da Virxen   | Muros-Noia | Bivalves   | <i>Cerastoderma edule</i>        |
| July 12, 2022 | Pont II. Niño do corvo   | Pontevedra | Bivalves   | <i>Ensis ensis</i>               |
| July 14, 2022 | Pont V. Placeres         | Pontevedra | Bivalves   | <i>Ruditapes philippinarum</i>   |
| July 11, 2022 | Vigo II.2 Xunqueira      | Vigo       | Bivalves   | <i>Ruditapes philippinarum</i>   |
| July 14, 2022 | Vigo II.2 Toralla        | Vigo       | Bivalves   | <i>Venerupis pullastra</i>       |



|                    |                           |            |             |                                  |
|--------------------|---------------------------|------------|-------------|----------------------------------|
| July 14, 2022      | Vigo II.2 Con. Norte      | Vigo       | Bivalves    | <i>Ruditapes philippinarum</i>   |
| July 7, 2022       | Pont II                   | Pontevedra | Bivalves    | <i>Venerupis rhomboides</i>      |
| July 29, 2022      | Arousa. Bohido            | Arousa     | Echinoderms | <i>Asteria rubens</i>            |
| July 29, 2022      | Arousa. Bohido            | Arousa     | Crustaceans | <i>Liocarcinus arcuatus</i>      |
| July 29, 2022      | Arousa. Bohido            | Arousa     | Crustaceans | <i>Chaetopleura angulata</i>     |
| July 29, 2022      | Arousa. Bohido            | Arousa     | Crustaceans | <i>Carcinus maenas</i>           |
| July 29, 2022      | Arousa. Bohido            | Arousa     | Crustaceans | <i>Liocarcinus corrugatus</i>    |
| July 29, 2022      | Arousa. Bohido            | Arousa     | Gastropods  | <i>Crepidula dilatata</i>        |
| September 10, 2022 | Nerga. Os Castros         | Vigo       | Echinoderms | <i>Paracentrotus sp.</i>         |
| September 10, 2022 | Nerga. Os Castros         | Vigo       | Gastropods  | <i>Monodonta sp.</i>             |
| September 10, 2022 | Nerga. Os Castros         | Vigo       | Gastropods  | <i>Patella sp.</i>               |
| September 10, 2022 | Nerga. Os Castros         | Vigo       | Cnidarias   | <i>n.i.</i>                      |
| September 10, 2022 | Nerga. Os Castros         | Vigo       | Crustaceans | <i>n.i.</i>                      |
| September 26, 2022 | Vilanova de Arousa. Corón | Arousa     | Bivalves    | <i>Mytilus galloprovincialis</i> |
| September 26, 2022 | Vilanova de Arousa. Corón | Arousa     | Crustaceans | <i>n.i.</i>                      |
| September 26, 2022 | Vilanova de Arousa. Corón | Arousa     | Gastropods  | <i>Littorina sp.</i>             |
| September 26, 2022 | Vilanova de Arousa. Corón | Arousa     | Gastropods  | <i>Monodonta sp.</i>             |
| September 26, 2022 | Vilanova de Arousa. Corón | Arousa     | Gastropods  | <i>Nucella sp.</i>               |
| September 26, 2022 | Vilanova de Arousa. Corón | Arousa     | Gastropods  | <i>Doris verrucosa</i>           |
| September 26, 2022 | Vilanova de Arousa. Corón | Arousa     | Gastropods  | <i>Patella sp.</i>               |
| September 26, 2022 | Vilanova de Arousa. Corón | Arousa     | Cnidarias   | <i>n.i.</i>                      |
| September 27, 2022 | Bueu. Cabo Udra           | Pontevedra | Gastropods  | <i>Patella sp.</i>               |
| September 27, 2022 | Porto do Son. Arnela      | Muros-Noia | Gastropods  | <i>Patella sp.</i>               |
| September 27, 2022 | Porto do Son. Arnela      | Muros-Noia | Echinoderms | <i>Asterina sp.</i>              |
| September 27, 2022 | Porto do Son. Arnela      | Muros-Noia | Polychaetes | <i>n.i.</i>                      |
| September 27, 2022 | Porto do Son. Arnela      | Muros-Noia | Gastropods  | <i>Patella sp.</i>               |
| September 27, 2022 | Porto do Son. Arnela      | Muros-Noia | Bivalves    | <i>Mytilus galloprovincialis</i> |
| September 27, 2022 | Porto do Son. Arnela      | Muros-Noia | Cnidarias   | <i>n.i.</i>                      |
| September 27, 2022 | Porto do Son. Arnela      | Muros-Noia | Crustaceans | <i>n.i.</i>                      |

|                    |                        |            |             |                                  |
|--------------------|------------------------|------------|-------------|----------------------------------|
| September 27, 2022 | Porto do Son. Arnela   | Muros-Noia | Gastropods  | <i>Aplysia punctata</i>          |
| September 27, 2022 | Porto do Son. Arnela   | Muros-Noia | Gastropods  | <i>Monodonta sp.</i>             |
| September 27, 2022 | Porto do Son. Arnela   | Muros-Noia | Gastropods  | <i>Gibbula sp.</i>               |
| September 27, 2022 | Porto do Son. Arnela   | Muros-Noia | Gastropods  | <i>Nucella sp.</i>               |
| September 28, 2022 | Bueu. Beluso           | Pontevedra | Cnidarias   | <i>n.i.</i>                      |
| September 28, 2022 | Bueu. Beluso           | Pontevedra | Bivalves    | <i>Mytilus galloprovincialis</i> |
| September 28, 2022 | Bueu. Beluso           | Pontevedra | Echinoderms | <i>Paracentrotus sp.</i>         |
| September 28, 2022 | Bueu. Beluso           | Pontevedra | Gastropods  | <i>Crepidula sp.</i>             |
| September 28, 2022 | Bueu. Beluso           | Pontevedra | Crustaceans | <i>n.i.</i>                      |
| September 28, 2022 | Bueu. Beluso           | Pontevedra | Bivalves    | <i>Ruditapes philippinarum</i>   |
| September 28, 2022 | Bueu. Beluso           | Pontevedra | Gastropods  | <i>Nucella sp.</i>               |
| September 28, 2022 | Bueu. Beluso           | Pontevedra | Gastropods  | <i>Monodonta sp.</i>             |
| September 28, 2022 | Bueu. Beluso           | Pontevedra | Gastropods  | <i>Patella sp.</i>               |
| September 28, 2022 | Aldán. Vilariño        | Pontevedra | Bivalves    | <i>Mytilus galloprovincialis</i> |
| September 28, 2022 | Aldán. Vilariño        | Pontevedra | Bivalves    | <i>Ostrea edulis</i>             |
| September 28, 2022 | Aldán. Vilariño        | Pontevedra | Bivalves    | <i>Ruditapes philippinarum</i>   |
| September 28, 2022 | Aldán. Vilariño        | Pontevedra | Gastropods  | <i>Patella sp.</i>               |
| September 28, 2022 | Aldán. Vilariño        | Pontevedra | Crustaceans | <i>n.i.</i>                      |
| September 28, 2022 | Aldán. Vilariño        | Pontevedra | Gastropods  | <i>Monodonta sp.</i>             |
| September 28, 2022 | Aldán. Vilariño        | Pontevedra | Sea squirts | <i>n.i.</i>                      |
| September 28, 2022 | Aldán. Vilariño        | Pontevedra | Gastropods  | <i>Crepidula sp.</i>             |
| September 28, 2022 | Aldán. Vilariño        | Pontevedra | Gastropods  | <i>Nucella sp.</i>               |
| September 28, 2022 | Aldán. Vilariño        | Pontevedra | Sea squirts | <i>Phallusia mammillata</i>      |
| October 5, 2022    | Aldán. Vilariño        | Pontevedra | Sea squirts | <i>Ascididae indet</i>           |
| September 29, 2022 | O Grove. Pedras negras | Arousa     | Cnidarias   | <i>n.i.</i>                      |
| September 28, 2022 | Muros. Tal             | Muros-Noia | Gastropods  | <i>Littorina sp.</i>             |
| October 11, 2022   | Arousa. Bohido         | Arousa     | Crustaceans | <i>Liocarcinus corrugatus</i>    |
| October 11, 2022   | Arousa. Bohido         | Arousa     | Crustaceans | <i>Carcinus maenas</i>           |
| October 11, 2022   | Arousa. Bohido         | Arousa     | Crustaceans | <i>Liocarcinus arcuatus</i>      |

|                  |                          |            |           |                                  |
|------------------|--------------------------|------------|-----------|----------------------------------|
| October 17, 2022 | Rianxo. Porrón           | Arousa     | Cnidarias | <i>n.i.</i>                      |
| July 15, 2022    | Corcubión. Pr.Cee        | Corcubión  | Bivalves  | <i>Cerastoderma edule</i>        |
| July 20, 2022    | Barqueiro. Pr. Salgueira | Barqueiro  | Bivalves  | <i>Mytilus galloprovincialis</i> |
| July 20, 2022    | Barallobre. Rampa        | Ferrol     | Bivalves  | <i>Mytilus galloprovincialis</i> |
| July 19, 2022    | Miño. Lombo Espiñeira    | Betanzos   | Bivalves  | <i>Ruditapes philippinarum</i>   |
| July 20, 2022    | Camariñas. Enseada Vasa  | Camariñas  | Bivalves  | <i>Ruditapes philippinarum</i>   |
| July 20, 2022    | Corcubión. Pr.Cee        | Corcubión  | Bivalves  | <i>Mytilus galloprovincialis</i> |
| July 19, 2022    | Muros I. Cabeiro         | Muros-Noia | Bivalves  | <i>Ensis ensis</i>               |
| July 19, 2022    | Pont II. Niño do Corvo   | Pontevedra | Bivalves  | <i>Ensis ensis</i>               |
| July 19, 2022    | Pont V. Placeres         | Pontevedra | Bivalves  | <i>Ruditapes philippinarum</i>   |
| July 19, 2022    | Vigo II.2. Areiño        | Vigo       | Bivalves  | <i>Venerupis pullastra</i>       |
| July 20, 2022    | Muros I. Abelleira       | Muros-Noia | Bivalves  | <i>Cerastoderma edule</i>        |
| July 21, 2022    | Pont V. Lourizán         | Pontevedra | Bivalves  | <i>Ensis ensis</i>               |
| July 21, 2022    | Pont V. Campelo          | Pontevedra | Bivalves  | <i>Ruditapes philippinarum</i>   |
| July 21, 2022    | Camariñas. Centro ría    | Camariñas  | Bivalves  | <i>Ensis siliqua</i>             |
| July 28, 2022    | Barqueiro. Pr. Salgueira | Barqueiro  | Bivalves  | <i>Mytilus galloprovincialis</i> |
| July 27, 2022    | Barallobre. Rampa        | Ferrol     | Bivalves  | <i>Mytilus galloprovincialis</i> |
| July 28, 2022    | Miño. Lombo Espiñeira    | Betanzos   | Bivalves  | <i>Ruditapes philippinarum</i>   |
| July 27, 2022    | Camariñas. Enseada Vasa  | Camariñas  | Bivalves  | <i>Ruditapes decussatus</i>      |
| July 27, 2022    | Corcubión. Pr.Cee        | Corcubión  | Bivalves  | <i>Mytilus galloprovincialis</i> |
| July 27, 2022    | Muros I. Pr.Virxen       | Muros-Noia | Bivalves  | <i>Cerastoderma edule</i>        |
| July 27, 2022    | Pont II. Niño do Corvo   | Pontevedra | Bivalves  | <i>Ensis ensis</i>               |
| July 27, 2022    | Pont V. Placeres         | Pontevedra | Bivalves  | <i>Ruditapes philippinarum</i>   |
| July 26, 2022    | Vigo II.2                | Vigo       | Bivalves  | <i>Ruditapes philippinarum</i>   |
| July 27, 2022    | Muros I. Pr.Virxen       | Muros-Noia | Bivalves  | <i>Ensis ensis</i>               |
| July 27, 2022    | Vigo II.2. Areiño        | Vigo       | Bivalves  | <i>Ruditapes philippinarum</i>   |
| July 27, 2022    | Vigo II.2. A Guía        | Vigo       | Bivalves  | <i>Ensis ensis</i>               |
| August 3, 2022   | Barallobre. Rampa        | Ferrol     | Bivalves  | <i>Mytilus galloprovincialis</i> |
| August 2, 2022   | Miño. Lombo Espiñeira    | Betanzos   | Bivalves  | <i>Ruditapes philippinarum</i>   |

|                 |                          |            |          |                                  |
|-----------------|--------------------------|------------|----------|----------------------------------|
| August 2, 2022  | Camariñas. Enseada Vasa  | Camariñas  | Bivalves | <i>Ruditapes decussatus</i>      |
| August 3, 2022  | Corcubión. Pr.Cee        | Corcubión  | Bivalves | <i>Cerastoderma edule</i>        |
| August 2, 2022  | Muros I. Abelleira       | Muros-Noia | Bivalves | <i>Cerastoderma edule</i>        |
| August 5, 2022  | Muros I                  | Muros-Noia | Bivalves | <i>Cerastoderma edule</i>        |
| August 2, 2022  | Pont II. San Cibrao      | Pontevedra | Bivalves | <i>Ruditapes philippinarum</i>   |
| August 2, 2022  | Pont V. Lourizán         | Pontevedra | Bivalves | <i>Ensis ensis</i>               |
| August 2, 2022  | Vigo II.2 Domaio         | Vigo       | Bivalves | <i>Ruditapes philippinarum</i>   |
| August 2, 2022  | Pont V. Placeres         | Pontevedra | Bivalves | <i>Ruditapes philippinarum</i>   |
| August 10, 2022 | Barqueiro. Pr. Salgueira | Barqueiro  | Bivalves | <i>Mytilus galloprovincialis</i> |
| August 10, 2022 | Miño. Lombo Espiñeira    | Betanzos   | Bivalves | <i>Ruditapes philippinarum</i>   |
| August 10, 2022 | Camariñas. Paxariñas     | Camariñas  | Bivalves | <i>Ruditapes decussatus</i>      |
| August 9, 2022  | Corcubión. Pr.Cee        | Corcubión  | Bivalves | <i>Mytilus galloprovincialis</i> |
| August 8, 2022  | Muros I. Abelleira       | Muros-Noia | Bivalves | <i>Cerastoderma edule</i>        |
| August 9, 2022  | Pont V. Placeres         | Pontevedra | Bivalves | <i>Ruditapes philippinarum</i>   |
| August 9, 2022  | Vigo II.2 Xunqueira      | Vigo       | Bivalves | <i>Ruditapes philippinarum</i>   |
| August 18, 2022 | Barqueiro. Pr. Salgueira | Barqueiro  | Bivalves | <i>Mytilus galloprovincialis</i> |
| August 18, 2022 | Barallobre. Pantalán     | Ferrol     | Bivalves | <i>Mytilus galloprovincialis</i> |
| August 17, 2022 | Miño. Lombo Espiñeira    | Betanzos   | Bivalves | <i>Ruditapes philippinarum</i>   |
| August 18, 2022 | Camariñas. Paxariñas     | Camariñas  | Bivalves | <i>Ruditapes philippinarum</i>   |
| August 18, 2022 | Corcubión. Pr.Cee        | Corcubión  | Bivalves | <i>Cerastoderma edule</i>        |
| August 17, 2022 | Muros I. Abelleira       | Muros-Noia | Bivalves | <i>Cerastoderma edule</i>        |
| August 18, 2022 | Arousa I. Moreiras       | Arousa     | Bivalves | <i>Ruditapes philippinarum</i>   |
| August 19, 2022 | Pont V. Placeres         | Pontevedra | Bivalves | <i>Ruditapes philippinarum</i>   |
| August 18, 2022 | Vigo II.2. Areiño        | Vigo       | Bivalves | <i>Venerupis pullastra</i>       |
| August 19, 2022 | Barallobre. Centro ría   | Ferrol     | Bivalves | <i>Venerupis rhomboideus</i>     |
| August 26, 2022 | Barqueiro. Pr. Salgueira | Barqueiro  | Bivalves | <i>Mytilus galloprovincialis</i> |
| August 23, 2022 | Barallobre. Pr.Maniños   | Ferrol     | Bivalves | <i>Cerastoderma edule</i>        |
| August 24, 2022 | Miño. Lombo Esp.         | Betanzos   | Bivalves | <i>Ruditapes philippinarum</i>   |
| August 23, 2022 | Camariñas. Pasariña      | Camariñas  | Bivalves | <i>Ruditapes philippinarum</i>   |

|                    |                          |            |          |                                  |
|--------------------|--------------------------|------------|----------|----------------------------------|
| August 24, 2022    | Corcubión. Pr.Cee        | Corcubión  | Bivalves | <i>Cerastoderma edule</i>        |
| August 23, 2022    | Muros I. Pr.Virxen       | Muros-Noia | Bivalves | <i>Cerastoderma edule</i>        |
| August 25, 2022    | Arousa I. Moreiras       | Arousa     | Bivalves | <i>Ruditapes philippinarum</i>   |
| August 22, 2022    | Pont V. Placeres         | Pontevedra | Bivalves | <i>Ruditapes philippinarum</i>   |
| August 24, 2022    | Vigo II.2. ETEA          | Vigo       | Bivalves | <i>Ruditapes philippinarum</i>   |
| August 31, 2022    | Barqueiro. Pr. Salgueira | Barqueiro  | Bivalves | <i>Mytilus galloprovincialis</i> |
| August 30, 2022    | Barallobre. Maniños      | Ferrol     | Bivalves | <i>Ruditapes philippinarum</i>   |
| August 30, 2022    | Miño. Lombo Esp.         | Betanzos   | Bivalves | <i>Ruditapes philippinarum</i>   |
| August 30, 2022    | Camariñas. Pasariña      | Camariñas  | Bivalves | <i>Ruditapes decussatus</i>      |
| August 30, 2022    | Corcubión. Pr.Cee        | Corcubión  | Bivalves | <i>Mytilus galloprovincialis</i> |
| August 30, 2022    | Muros I. Abelleira       | Muros-Noia | Bivalves | <i>Cerastoderma edule</i>        |
| August 30, 2022    | Arousa I. Moreiras       | Arousa     | Bivalves | <i>Ruditapes philippinarum</i>   |
| August 30, 2022    | Pont V. Placeres         | Pontevedra | Bivalves | <i>Ruditapes philippinarum</i>   |
| August 30, 2022    | Vigo II.2. Pr.Xunqueira  | Vigo       | Bivalves | <i>Ruditapes philippinarum</i>   |
| September 7, 2022  | Barqueiro. Pr. Salgueira | Barqueiro  | Bivalves | <i>Mytilus galloprovincialis</i> |
| September 6, 2022  | Barallobre. Pt del Tren  | Ferrol     | Bivalves | <i>Ruditapes philippinarum</i>   |
| September 7, 2022  | Miño. Lombo Esp.         | Betanzos   | Bivalves | <i>Ruditapes philippinarum</i>   |
| September 7, 2022  | Camariñas. Zona E        | Camariñas  | Bivalves | <i>Ensis ensis</i>               |
| September 6, 2022  | Corcubión. Pr.Cee        | Corcubión  | Bivalves | <i>Mytilus galloprovincialis</i> |
| September 7, 2022  | Muros I. Pr.Virxen       | Muros-Noia | Bivalves | <i>Cerastoderma edule</i>        |
| September 7, 2022  | Muros III. Testal        | Muros-Noia | Bivalves | <i>Cerastoderma edule</i>        |
| September 7, 2022  | Arousa I. Pr.Carreiro    | Arousa     | Bivalves | <i>Ensis ensis</i>               |
| September 8, 2022  | Pont II. San Cibrao      | Pontevedra | Bivalves | <i>Cerastoderma edule</i>        |
| September 8, 2022  | Pont V. Placeres         | Pontevedra | Bivalves | <i>Ruditapes philippinarum</i>   |
| September 8, 2022  | Vigo II.2. ETEA          | Vigo       | Bivalves | <i>Ruditapes philippinarum</i>   |
| September 7, 2022  | Camariñas. Pasariña      | Camariñas  | Bivalves | <i>Ruditapes decussatus</i>      |
| September 8, 2022  | Vigo II.2. A Guia        | Vigo       | Bivalves | <i>Ensis ensis</i>               |
| September 9, 2022  | Pont II                  | Pontevedra | Bivalves | <i>Ensis ensis</i>               |
| September 13, 2022 | Barqueiro. Pr. Salgueira | Barqueiro  | Bivalves | <i>Mytilus galloprovincialis</i> |

|                    |                          |            |          |                                  |
|--------------------|--------------------------|------------|----------|----------------------------------|
| September 14, 2022 | Barallobre. Pantalán     | Ferrol     | Bivalves | <i>Mytilus galloprovincialis</i> |
| September 13, 2022 | Miño. Lombo Esp          | Betanzos   | Bivalves | <i>Ruditapes philippinarum</i>   |
| September 14, 2022 | Camariñas. Río da Ponte  | Camariñas  | Bivalves | <i>Ruditapes decussatus</i>      |
| September 13, 2022 | Corcubión. Pr.Cee        | Corcubión  | Bivalves | <i>Mytilus galloprovincialis</i> |
| September 14, 2022 | Muros I. Pr.Virxen       | Muros-Noia | Bivalves | <i>Cerastoderma edule</i>        |
| September 13, 2022 | Muros III. Testal        | Muros-Noia | Bivalves | <i>Cerastoderma edule</i>        |
| September 14, 2022 | Arousa I. Cantodorxo     | Arousa     | Bivalves | <i>Ruditapes philippinarum</i>   |
| September 14, 2022 | Arousa VI. Sarrido       | Arousa     | Bivalves | <i>Ruditapes philippinarum</i>   |
| September 13, 2022 | Pont II. San Cibrao      | Pontevedra | Bivalves | <i>Cerastoderma edule</i>        |
| September 16, 2022 | Pont V. Placeres         | Pontevedra | Bivalves | <i>Ruditapes philippinarum</i>   |
| September 15, 2022 | Vigo II.2. ETEA          | Vigo       | Bivalves | <i>Ruditapes decussatus</i>      |
| September 16, 2022 | Muros I. Pr.Virxen       | Muros-Noia | Bivalves | <i>Cerastoderma edule</i>        |
| September 16, 2022 | Muros III. Testal        | Muros-Noia | Bivalves | <i>Cerastoderma edule</i>        |
| September 21, 2022 | Barqueiro. Pr. Salgueira | Barqueiro  | Bivalves | <i>Mytilus galloprovincialis</i> |
| September 22, 2022 | Miño. Lombo Esp.         | Betanzos   | Bivalves | <i>Ruditapes philippinarum</i>   |
| September 21, 2022 | Camariñas. Río da Ponte  | Camariñas  | Bivalves | <i>Ruditapes philippinarum</i>   |
| September 21, 2022 | Corcubión. Pr.Cee        | Corcubión  | Bivalves | <i>Mytilus galloprovincialis</i> |
| September 20, 2022 | Muros I. Abelleira       | Muros-Noia | Bivalves | <i>Cerastoderma edule</i>        |
| September 20, 2022 | Muros III. Testal        | Muros-Noia | Bivalves | <i>Cerastoderma edule</i>        |
| September 20, 2022 | Arousa I. Meloxo         | Arousa     | Bivalves | <i>Venerupis pullastra</i>       |
| September 20, 2022 | Pont II. San Cibrao      | Pontevedra | Bivalves | <i>Cerastoderma edule</i>        |
| September 20, 2022 | Pont V. Placeres         | Pontevedra | Bivalves | <i>Ruditapes philippinarum</i>   |
| September 21, 2022 | Vigo II.2. ETEA          | Vigo       | Bivalves | <i>Ruditapes philippinarum</i>   |
| September 21, 2022 | Vigo II.2. A Guia        | Vigo       | Bivalves | <i>Ensis ensis</i>               |
| September 21, 2022 | Camariñas. Zona E        | Camariñas  | Bivalves | <i>Ensis ensis</i>               |
| September 23, 2022 | Muros I. Pr.Virxen       | Muros-Noia | Bivalves | <i>Cerastoderma edule</i>        |
| September 23, 2022 | Muros III. Testal        | Muros-Noia | Bivalves | <i>Cerastoderma edule</i>        |
| September 23, 2022 | Arousa I. Airo grande    | Arousa     | Bivalves | <i>Ruditapes philippinarum</i>   |
| September 27, 2022 | Barqueiro. Pr. Salgueira | Barqueiro  | Bivalves | <i>Mytilus galloprovincialis</i> |

|                    |                          |            |          |                                  |
|--------------------|--------------------------|------------|----------|----------------------------------|
| September 28, 2022 | Barallobre. Pr.Maniños   | Ferrol     | Bivalves | <i>Cerastoderma edule</i>        |
| September 27, 2022 | Miño. Lombo Esp.         | Betanzos   | Bivalves | <i>Ruditapes philippinarum</i>   |
| September 27, 2022 | Camariñas. Pasariña      | Camariñas  | Bivalves | <i>Ruditapes decussatus</i>      |
| September 27, 2022 | Corcubión. Pr.Cee        | Corcubión  | Bivalves | <i>Ensis ensis</i>               |
| September 27, 2022 | Muros I. Pta.Cabeiro     | Muros-Noia | Bivalves | <i>Ensis ensis</i>               |
| September 26, 2022 | Muros III                | Muros-Noia | Bivalves | <i>Cerastoderma edule</i>        |
| September 27, 2022 | Pont II. Niño do corvo   | Pontevedra | Bivalves | <i>Ensis ensis</i>               |
| September 27, 2022 | Pont V. Placeres         | Pontevedra | Bivalves | <i>Ruditapes philippinarum</i>   |
| September 27, 2022 | Vigo II.2. ETEA          | Vigo       | Bivalves | <i>Ruditapes philippinarum</i>   |
| September 27, 2022 | Vigo II.2                | Vigo       | Bivalves | <i>Ensis ensis</i>               |
| September 28, 2022 | Muros III                | Muros-Noia | Bivalves | <i>Ruditapes philippinarum</i>   |
| September 28, 2022 | Muros III                | Muros-Noia | Bivalves | <i>Cerastoderma edule</i>        |
| September 29, 2022 | Vigo II.2                | Vigo       | Bivalves | <i>Ruditapes philippinarum</i>   |
| September 30, 2022 | Pont V. Placeres         | Pontevedra | Bivalves | <i>Ruditapes philippinarum</i>   |
| October 5, 2022    | Barqueiro. Pr. Salgueira | Barqueiro  | Bivalves | <i>Mytilus galloprovincialis</i> |
| October 4, 2022    | Barallobre. Pantalán     | Ferrol     | Bivalves | <i>Mytilus galloprovincialis</i> |
| October 5, 2022    | Miño. Lombo Esp.         | Betanzos   | Bivalves | <i>Ruditapes philippinarum</i>   |
| October 4, 2022    | Camariñas. Pasariña      | Camariñas  | Bivalves | <i>Ruditapes decussatus</i>      |
| October 5, 2022    | Corcubión. Pr.Cee        | Corcubión  | Bivalves | <i>Cerastoderma edule</i>        |
| October 4, 2022    | Muros I. Pr.Virxen       | Muros-Noia | Bivalves | <i>Ensis ensis</i>               |
| October 3, 2022    | Muros III. Pedras        | Muros-Noia | Bivalves | <i>Ruditapes philippinarum</i>   |
| October 4, 2022    | Pont II. Sartaxéns       | Pontevedra | Bivalves | <i>Ensis ensis</i>               |
| October 4, 2022    | Pont V. Placeres         | Pontevedra | Bivalves | <i>Ruditapes philippinarum</i>   |
| October 4, 2022    | Vigo II.2 ETEA           | Vigo       | Bivalves | <i>Ruditapes philippinarum</i>   |
| October 4, 2022    | Camariñas. Zona E        | Camariñas  | Bivalves | <i>Ensis ensis</i>               |
| October 4, 2022    | Pont II. Río Esteiro     | Pontevedra | Bivalves | <i>Cerastoderma edule</i>        |
| October 4, 2022    | Vigo II.2. A Guía        | Vigo       | Bivalves | <i>Ensis ensis</i>               |
| October 5, 2022    | Muros III. As pedras     | Muros-Noia | Bivalves | <i>Ruditapes philippinarum</i>   |
| October 5, 2022    | Corcubión. Pr.Cee        | Corcubión  | Bivalves | <i>Ensis ensis</i>               |

|                  |                          |            |          |                                  |
|------------------|--------------------------|------------|----------|----------------------------------|
| October 5, 2022  | Muros III. As pedras     | Muros-Noia | Bivalves | <i>Cerastoderma edule</i>        |
| October 5, 2022  | Camariñas. Pasariña      | Camariñas  | Bivalves | <i>Ruditapes decussatus</i>      |
| October 5, 2022  | Camariñas. Ria Camariña  | Camariñas  | Bivalves | <i>Ensis ensis</i>               |
| October 11, 2022 | Barqueiro. Pr. Salgueira | Barqueiro  | Bivalves | <i>Mytilus galloprovincialis</i> |
| October 11, 2022 | Barallobre. Pr.Maniños   | Ferrol     | Bivalves | <i>Ruditapes philippinarum</i>   |
| October 11, 2022 | Miño. Lombo Esp.         | Betanzos   | Bivalves | <i>Cerastoderma edule</i>        |
| October 11, 2022 | Camariñas. Pasariña      | Camariñas  | Bivalves | <i>Ruditapes decussatus</i>      |
| October 11, 2022 | Corcubión. Pr.Cee        | Corcubión  | Bivalves | <i>Cerastoderma edule</i>        |
| October 11, 2022 | Muros I. Cabeiro         | Muros-Noia | Bivalves | <i>Ensis ensis</i>               |
| October 10, 2022 | Muros III. Testal        | Muros-Noia | Bivalves | <i>Cerastoderma edule</i>        |
| October 11, 2022 | Pont V. Placeres         | Pontevedra | Bivalves | <i>Ensis ensis</i>               |
| October 10, 2022 | Muros III. Testal        | Muros-Noia | Bivalves | <i>Ruditapes philippinarum</i>   |
| October 11, 2022 | Pont V. Placeres         | Pontevedra | Bivalves | <i>Ruditapes philippinarum</i>   |
| October 19, 2022 | Barqueiro. Pr. Salgueira | Barqueiro  | Bivalves | <i>Mytilus galloprovincialis</i> |
| October 18, 2022 | Barallobre. Pr.Maniños   | Ferrol     | Bivalves | <i>Ruditapes philippinarum</i>   |
| October 18, 2022 | Miño. Lombo Esp.         | Betanzos   | Bivalves | <i>Cerastoderma edule</i>        |
| October 18, 2022 | Camariñas. Paxariña      | Camariñas  | Bivalves | <i>Ruditapes decussatus</i>      |
| October 19, 2022 | Corcubión. Pr.Cee        | Corcubión  | Bivalves | <i>Cerastoderma edule</i>        |
| October 17, 2022 | Muros III. Testal        | Muros-Noia | Bivalves | <i>Ruditapes philippinarum</i>   |
| October 18, 2022 | Pont II. Area Brava      | Pontevedra | Bivalves | <i>Ensis ensis</i>               |
| October 17, 2022 | Muros III. Testal        | Muros-Noia | Bivalves | <i>Cerastoderma edule</i>        |
| October 19, 2022 | Po II. Aldan             | Pontevedra | Bivalves | <i>Cerastoderma edule</i>        |
| October 26, 2022 | Barqueiro                | Barqueiro  | Bivalves | <i>Mytilus galloprovincialis</i> |
| October 25, 2022 | Barallobre. Pantalán     | Ferrol     | Bivalves | <i>Mytilus galloprovincialis</i> |
| October 25, 2022 | Miño. Lombo Esp.         | Betanzos   | Bivalves | <i>Cerastoderma edule</i>        |
| October 25, 2022 | Camariñas. Paxariña      | Camariñas  | Bivalves | <i>Ruditapes decussatus</i>      |
| October 25, 2022 | Corcubión. Pr.Cee        | Corcubión  | Bivalves | <i>Cerastoderma edule</i>        |
| October 25, 2022 | Muros I. Cabaneiro       | Muros-Noia | Bivalves | <i>Ensis ensis</i>               |
| October 24, 2022 | Muros III. Testal        | Muros-Noia | Bivalves | <i>Cerastoderma edule</i>        |



|                   |                          |            |             |                                  |
|-------------------|--------------------------|------------|-------------|----------------------------------|
| November 4, 2022  | Barqueiro. Pr. Salgueira | Barqueiro  | Bivalves    | <i>Mytilus galloprovincialis</i> |
| November 3, 2022  | Miño. Lombo Esp.         | Betanzos   | Bivalves    | <i>Cerastoderma edule</i>        |
| November 3, 2022  | Camariñas. Paxariña      | Camariñas  | Bivalves    | <i>Ruditapes decussatus</i>      |
| November 2, 2022  | Corcubión. Pr.Cee        | Corcubión  | Bivalves    | <i>Mytilus galloprovincialis</i> |
| November 2, 2022  | Muros III. Testal        | Muros-Noia | Bivalves    | <i>Cerastoderma edule</i>        |
| November 2, 2022  | Pont II. Cofeife         | Pontevedra | Bivalves    | <i>Ensis ensis</i>               |
| November 4, 2022  | Pont V. Placeres         | Pontevedra | Bivalves    | <i>Ruditapes philippinarum</i>   |
| November 4, 2022  | Pont II. Rio Esteiro     | Pontevedra | Bivalves    | <i>Cerastoderma edule</i>        |
| November 8, 2022  | Barqueiro. Pr. Salgueira | Barqueiro  | Bivalves    | <i>Mytilus galloprovincialis</i> |
| November 8, 2022  | Miño. Lombo Esp          | Betanzos   | Bivalves    | <i>Cerastoderma edule</i>        |
| November 8, 2022  | Camariñas. Paxariña      | Camariñas  | Bivalves    | <i>Ruditapes decussatus</i>      |
| November 8, 2022  | Corcubión. Pr.Cee        | Corcubión  | Bivalves    | <i>Mytilus galloprovincialis</i> |
| November 7, 2022  | Muros III                | Muros-Noia | Bivalves    | <i>Ruditapes philippinarum</i>   |
| November 11, 2022 | Pont V. Placeres         | Pontevedra | Bivalves    | <i>Ruditapes philippinarum</i>   |
| November 15, 2022 | Barallobre. Rampa        | Ferrol     | Bivalves    | <i>Mytilus galloprovincialis</i> |
| November 15, 2022 | Miño. Lombo Esp          | Betanzos   | Bivalves    | <i>Cerastoderma edule</i>        |
| November 15, 2022 | Camariñas. Rio da Ponte  | Camariñas  | Bivalves    | <i>Ruditapes decussatus</i>      |
| November 15, 2022 | Muros I. Cabaneiro       | Muros-Noia | Echinoderms | <i>Holoturia sp.</i>             |
| November 25, 2022 | Porto do Son. Arnela     | Muros-Noia | Echinoderms | <i>Asterina sp.</i>              |
| November 25, 2022 | Porto do Son. Arnela     | Muros-Noia | Echinoderms | <i>Paracentrotus sp.</i>         |
| November 25, 2022 | Porto do Son. Arnela     | Muros-Noia | Cnidarias   | <i>n.i.</i>                      |
| November 25, 2022 | Porto do Son. Arnela     | Muros-Noia | Crustaceans | <i>n.i.</i>                      |
| November 25, 2022 | Porto do Son. Arnela     | Muros-Noia | Bivalves    | <i>Mytilus galloprovincialis</i> |
| November 25, 2022 | Porto do Son. Arnela     | Muros-Noia | Gastropods  | <i>Monodonta sp.</i>             |
| November 25, 2022 | Porto do Son. Arnela     | Muros-Noia | Gastropods  | <i>Patella sp.</i>               |
| November 25, 2022 | Porto do Son. Arnela     | Muros-Noia | Cnidarias   | <i>n.i.</i>                      |
| November 25, 2022 | Porto do Son. Arnela     | Muros-Noia | Gastropods  | <i>Nucella sp.</i>               |
| November 25, 2022 | Ramalloa. Esteiro Foz    | Vigo       | Bivalves    | <i>Ruditapes philippinarum</i>   |
| November 25, 2022 | Ramalloa. Esteiro Foz    | Vigo       | Bivalves    | <i>Mytilus galloprovincialis</i> |

|                   |                          |            |             |                                    |
|-------------------|--------------------------|------------|-------------|------------------------------------|
| November 25, 2022 | Ramallosa. Esteiro Foz   | Vigo       | Bivalves    | <i>Ostrea edulis</i>               |
| November 25, 2022 | Ramallosa. Esteiro Foz   | Vigo       | Gastropods  | <i>Littorina sp.</i>               |
| November 25, 2022 | Ramallosa. Esteiro Foz   | Vigo       | Crustaceans | <i>Polybius sp.</i>                |
| November 25, 2022 | Bueu. Beluso             | Pontevedra | Echinoderms | <i>Paracentrotus sp.</i>           |
| November 25, 2022 | Bueu. Beluso             | Pontevedra | Bivalves    | <i>Mytilus galloprovincialis</i>   |
| November 25, 2022 | Bueu. Beluso             | Pontevedra | Gastropods  | <i>Patella sp.</i>                 |
| November 25, 2022 | Bueu. Beluso             | Pontevedra | Cnidarias   | <i>n.i.</i>                        |
| November 25, 2022 | Bueu. Beluso             | Pontevedra | Gastropods  | <i>Monodonta sp.</i>               |
| November 25, 2022 | Bueu. Beluso             | Pontevedra | Gastropods  | <i>Gibbula sp.</i>                 |
| November 28, 2022 | Aldán. Vilariño          | Pontevedra | Gastropods  | <i>Patella sp.</i>                 |
| November 28, 2022 | Aldán. Vilariño          | Pontevedra | Bivalves    | <i>Dosinia exoleta</i>             |
| November 28, 2022 | Aldán. Vilariño          | Pontevedra | Gastropods  | <i>Nucella sp.</i>                 |
| November 28, 2022 | Aldán. Vilariño          | Pontevedra | Gastropods  | <i>Monodonta sp.</i>               |
| November 28, 2022 | Aldán. Vilariño          | Pontevedra | Bivalves    | <i>Ostrea edulis</i>               |
| November 28, 2022 | Aldán. Vilariño          | Pontevedra | Cnidarias   | <i>n.i.</i>                        |
| November 28, 2022 | Aldán. Vilariño          | Pontevedra | Bivalves    | <i>Mytilus galloprovincialis</i>   |
| November 10, 2022 | Arousa. Bohido           | Arousa     | Crustaceans | <i>Inachus phalangium</i>          |
| November 10, 2022 | Arousa. Bohido           | Arousa     | Crustaceans | <i>Liocarcinus arcuatus</i>        |
| November 10, 2022 | Arousa. Bohido           | Arousa     | Crustaceans | <i>Liocarcinus corrugatus</i>      |
| November 10, 2022 | Arousa. Bohido           | Arousa     | Crustaceans | <i>Atelecyclus undecimdentatus</i> |
| November 10, 2022 | Arousa. Bohido           | Arousa     | Crustaceans | <i>Pagurus prideaux</i>            |
| November 10, 2022 | Arousa. Bohido           | Arousa     | Echinoderms | <i>Asterina gibbosa</i>            |
| November 10, 2022 | Arousa. Bohido           | Arousa     | Gastropods  | <i>Tritia reticulata</i>           |
| November 10, 2022 | Muros                    | Muros-Noia | Crustaceans | <i>Polybius sp.</i>                |
| October 25, 2022  | Cangas                   | Vigo       | Bivalves    | <i>Ruditapes decussatus</i>        |
| November 16, 2022 | Barqueiro. Pr. Salgueira | Barqueiro  | Bivalves    | <i>Mytilus galloprovincialis</i>   |
| November 16, 2022 | Corcubión. Pr.Cee        | Corcubión  | Bivalves    | <i>Mytilus galloprovincialis</i>   |
| November 23, 2022 | Barqueiro. Pr. Salgueira | Barqueiro  | Bivalves    | <i>Mytilus galloprovincialis</i>   |
| November 22, 2022 | Barallobre. Pantalán     | Ferrol     | Bivalves    | <i>Mytilus galloprovincialis</i>   |

|                   |                          |           |             |                                  |
|-------------------|--------------------------|-----------|-------------|----------------------------------|
| November 22, 2022 | Miño. Lombo Esp.         | Betanzos  | Bivalves    | <i>Cerastoderma edule</i>        |
| November 22, 2022 | Pasaxe. O Parrote        | A Coruña  | Bivalves    | <i>Mytilus galloprovincialis</i> |
| November 22, 2022 | Camariñas. Paxariña      | Camariñas | Bivalves    | <i>Ruditapes decussatus</i>      |
| November 22, 2022 | Corcubión. Pr.Cee        | Corcubión | Bivalves    | <i>Mytilus galloprovincialis</i> |
| November 29, 2022 | Barqueiro. Pr. Salgueira | Barqueiro | Bivalves    | <i>Mytilus galloprovincialis</i> |
| November 29, 2022 | Barallobre. Pantalán     | Ferrol    | Bivalves    | <i>Mytilus galloprovincialis</i> |
| November 29, 2022 | Miño. Muro Petra Sabio   | Betanzos  | Bivalves    | <i>Mytilus galloprovincialis</i> |
| November 29, 2022 | Pasaxe. O Parrote        | A Coruña  | Bivalves    | <i>Mytilus galloprovincialis</i> |
| November 29, 2022 | Camariñas. Paxariña      | Camariñas | Bivalves    | <i>Ruditapes decussatus</i>      |
| November 30, 2022 | Corcubión. Pr.Cee        | Corcubión | Bivalves    | <i>Mytilus galloprovincialis</i> |
| December 7, 2022  | Barqueiro. Pr. Salgueira | Barqueiro | Bivalves    | <i>Mytilus galloprovincialis</i> |
| December 7, 2022  | Miño. Muro Petra Sabio   | Betanzos  | Bivalves    | <i>Mytilus galloprovincialis</i> |
| December 7, 2022  | Camariñas. Enseada Vasa  | Camariñas | Bivalves    | <i>Mytilus galloprovincialis</i> |
| December 7, 2022  | Corcubión. Pr.Cee        | Corcubión | Bivalves    | <i>Mytilus galloprovincialis</i> |
| December 13, 2022 | Barqueiro. Pr. Salgueira | Barqueiro | Bivalves    | <i>Mytilus galloprovincialis</i> |
| December 13, 2022 | Barallobre. Rampa        | Ferrol    | Bivalves    | <i>Mytilus galloprovincialis</i> |
| December 13, 2022 | Miño. Muro Petra Sabio   | Betanzos  | Bivalves    | <i>Mytilus galloprovincialis</i> |
| December 13, 2022 | Camariñas. Río da Ponte  | Camariñas | Bivalves    | <i>Ruditapes decussatus</i>      |
| December 13, 2022 | Corcubión. Pr.Cee        | Corcubión | Bivalves    | <i>Mytilus galloprovincialis</i> |
| December 21, 2022 | Barqueiro. Pr. Salgueira | Barqueiro | Bivalves    | <i>Mytilus galloprovincialis</i> |
| December 20, 2022 | Barallobre. Rampa        | Ferrol    | Bivalves    | <i>Mytilus galloprovincialis</i> |
| December 21, 2022 | Miño. Muro Petra Sabio   | Betanzos  | Bivalves    | <i>Mytilus galloprovincialis</i> |
| December 22, 2022 | Camariñas. Paxariña      | Camariñas | Bivalves    | <i>Ruditapes decussatus</i>      |
| December 20, 2022 | Corcubión. Pr.Cee        | Corcubión | Bivalves    | <i>Mytilus galloprovincialis</i> |
| December 27, 2022 | Barqueiro. Pr. Salgueira | Barqueiro | Bivalves    | <i>Mytilus galloprovincialis</i> |
| December 27, 2022 | Barallobre. Pantalán     | Ferrol    | Bivalves    | <i>Mytilus galloprovincialis</i> |
| December 27, 2022 | Miño. Muro Petra Sabio   | Betanzos  | Bivalves    | <i>Mytilus galloprovincialis</i> |
| December 27, 2022 | Camariñas. Río da Ponte  | Camariñas | Bivalves    | <i>Ruditapes decussatus</i>      |
| April 6, 2021     | Vigo. Cabo Estai         | Vigo      | Echinoderms | <i>Paracentrotus lividus</i>     |

|               |                        |      |             |                                |
|---------------|------------------------|------|-------------|--------------------------------|
| April 6, 2021 | Vigo. Cabo Estai       | Vigo | Gastropods  | <i>Monodonta lineata</i>       |
| April 6, 2021 | Vigo. Cabo Estai       | Vigo | Gastropods  | <i>Patella spp.</i>            |
| April 6, 2021 | Vigo. Cabo Estai       | Vigo | Cnidarias   | <i>Actinia equina</i>          |
| April 6, 2021 | Vigo. Cabo Estai       | Vigo | Crustaceans | <i>Pachygrapsus marmoratus</i> |
| April 6, 2021 | Vigo. Cabo Estai       | Vigo | Cnidarias   | <i>Anemonia viridis</i>        |
| May 25, 2021  | Vigo. Praia A Fontaíña | Vigo | Gastropods  | <i>Patella spp.</i>            |
| May 25, 2021  | Vigo. Praia A Fontaíña | Vigo | Echinoderms | <i>Marthasterias glacialis</i> |
| May 25, 2021  | Vigo. Praia A Fontaíña | Vigo | Cnidarias   | <i>Actinia equina</i>          |
| May 25, 2021  | Vigo. Praia A Fontaíña | Vigo | Echinoderms | <i>Paracentrotus lividus</i>   |
| May 25, 2021  | Vigo. Praia Canido     | Vigo | Echinoderms | <i>Paracentrotus lividus</i>   |
| May 25, 2021  | Vigo. Praia Canido     | Vigo | Cnidarias   | <i>Actinia equina</i>          |
| May 25, 2021  | Vigo. Praia Canido     | Vigo | Gastropods  | <i>Haliotis tuberculata</i>    |
| May 25, 2021  | Vigo. Praia Canido     | Vigo | Gastropods  | <i>Patella spp.</i>            |
| May 25, 2021  | Vigo. Praia Canido     | Vigo | Cnidarias   | <i>Anemonia viridis</i>        |
| May 25, 2021  | Vigo. Praia Canido     | Vigo | Gastropods  | <i>Monodonta lineata</i>       |
| June 6, 2021  | Vigo. Monteferro       | Vigo | Cnidarias   | <i>Actinia equina</i>          |
| June 6, 2021  | Vigo. Monteferro       | Vigo | Cnidarias   | <i>Anemonia viridis</i>        |
| June 6, 2021  | Vigo. Monteferro       | Vigo | Gastropods  | <i>Monodonta lineata</i>       |
| June 6, 2021  | Vigo. Monteferro       | Vigo | Gastropods  | <i>Patella spp.</i>            |
| June 6, 2021  | Vigo. Monteferro       | Vigo | Echinoderms | <i>Paracentrotus lividus</i>   |
| June 6, 2021  | Vigo. Monteferro       | Vigo | Gastropods  | <i>Haliotis tuberculata</i>    |
| June 6, 2021  | Vigo. Monteferro       | Vigo | Crustaceans | <i>Cancer pagurus</i>          |
| June 6, 2021  | Vigo. Monteferro       | Vigo | Crustaceans | <i>Pachygrapsus marmoratus</i> |
| June 6, 2021  | Vigo. Monteferro       | Vigo | Crustaceans | <i>Carcinus maenas</i>         |
| June 24, 2021 | Baiona. Cabo Silleiro  | Vigo | Gastropods  | <i>Monodonta lineata</i>       |
| June 24, 2021 | Baiona. Cabo Silleiro  | Vigo | Gastropods  | <i>Patella spp.</i>            |
| June 24, 2021 | Baiona. Cabo Silleiro  | Vigo | Echinoderms | <i>Paracentrotus lividus</i>   |
| June 24, 2021 | Baiona. Cabo Silleiro  | Vigo | Echinoderms | <i>Marthasterias glacialis</i> |
| June 24, 2021 | Baiona. Cabo Silleiro  | Vigo | Cnidarias   | <i>Actinia equina</i>          |

|                    |                       |            |             |                                |
|--------------------|-----------------------|------------|-------------|--------------------------------|
| June 24, 2021      | Baiona. Cabo Silleiro | Vigo       | Cnidarias   | <i>Anemonia viridis</i>        |
| June 24, 2021      | Baiona. Cabo Silleiro | Vigo       | Crustaceans | <i>Pachygrapsus marmoratus</i> |
| September 10, 2021 | Vigo. Porto           | Vigo       | Cnidarias   | <i>Veretillum cynomorium</i>   |
| September 12, 2021 | Sada. Porto           | Betanzos   | Gastropods  | <i>Nassarius sp.</i>           |
| October 6, 2021    | Vigo. Praia Canido    | Vigo       | Cnidarias   | <i>Anemonia viridis</i>        |
| October 6, 2021    | Vigo. Praia Canido    | Vigo       | Crustaceans | <i>Necora puber</i>            |
| October 6, 2021    | Vigo. Praia Canido    | Vigo       | Crustaceans | <i>Palaemon serratus</i>       |
| October 6, 2021    | Vigo. Praia Canido    | Vigo       | Echinoderms | <i>Paracentrotus lividus</i>   |
| September 3, 2021  | 41.912, -9.1965*      | Vigo       | Gastropods  | <i>Neptunea contraria</i>      |
| September 5, 2021  | 42.3216, -9.067*      | Vigo       | Echinoderms | <i>Luidia sarsi</i>            |
| September 2, 2021  | 42.0436, -9.1135*     | Vigo       | Cephalopods | <i>Todaropsis eblanae</i>      |
| September 2, 2021  | 42.0436, -9.1135*     | Vigo       | Cephalopods | <i>Todaropsis eblanae</i>      |
| September 2, 2021  | 42.0436, -9.1135*     | Vigo       | Cephalopods | <i>Eledone cirrhosa</i>        |
| September 3, 2021  | 41.9055, -9.076*      | Vigo       | Cephalopods | <i>Alloteuthis sp.</i>         |
| September 3, 2021  | 41.912, -9.1965*      | Vigo       | Gastropods  | <i>Buccinum humphreysianum</i> |
| September 3, 2021  | 41.912, -9.1965*      | Vigo       | Crustaceans | <i>Macropipus tuberculatus</i> |
| September 11, 2021 | 42.7436, -9.3263*     | Muros-Noia | Polychaetes | <i>Aphrodite aculeata</i>      |
| September 8, 2021  | 42.3438, -9.093*      | Pontevedra | Polychaetes | <i>Aphrodite aculeata</i>      |
| September 3, 2021  | 41.9055, -9.076*      | Vigo       | Sea squirts | <i>Corella paralelograma</i>   |
| September 3, 2021  | 41.912, -9.1965*      | Vigo       | Gastropods  | <i>Colus gracilis</i>          |
| September 3, 2021  | 41.9045, -9.0748*     | Vigo       | Crustaceans | <i>Munida intermedia</i>       |
| September 2, 2021  | 42.0436, -9.1135*     | Vigo       | Crustaceans | <i>Pagurus prideaux</i>        |
| September 2, 2021  | 42.0436, -9.1135*     | Vigo       | Echinoderms | <i>Parastichopus regalis</i>   |
| September 5, 2021  | 42.231, -9.068*       | Vigo       | Echinoderms | <i>Brissopsis lyrifera</i>     |
| September 8, 2021  | 42.2856, -9.1486*     | Vigo       | Cnidarias   | <i>Actinauge richardi</i>      |
| September 8, 2021  | 42.2856, -9.14866*    | Vigo       | Gastropods  | <i>Euspira fusca</i>           |
| October 25, 2021   | Vigo. Porto           | Vigo       | Cephalopods | <i>Sepia officinalis</i>       |
| October 25, 2021   | Vigo. Porto           | Vigo       | Cephalopods | <i>Sepia officinalis</i>       |
| October 25, 2021   | Vigo. Porto           | Vigo       | Cnidarias   | <i>Veretillum cynomorium</i>   |

|                    |                        |          |             |                                  |
|--------------------|------------------------|----------|-------------|----------------------------------|
| September 5, 2021  | 42.231, -9.068*        | Vigo     | Cnidarias   | <i>Funiculina quadrangularis</i> |
| September 3, 2021  | 41.9055, -9.076*       | Vigo     | Cnidarias   | <i>Adamsia carcinopadus</i>      |
| April 6, 2021      | Vigo. Cabo Estai       | Vigo     | Crustaceans | <i>Palaemon serratus</i>         |
| May 25, 2021       | Vigo. Praia A Fontaíña | Vigo     | Bivalves    | <i>Mytilus galloprovincialis</i> |
| May 25, 2021       | Vigo. Praia Canido     | Vigo     | Bivalves    | <i>Mytilus galloprovincialis</i> |
| June 24, 2021      | Baiona. Cabo Silleiro  | Vigo     | Bivalves    | <i>Mytilus galloprovincialis</i> |
| June 24, 2021      | Baiona. Cabo Silleiro  | Vigo     | Crustaceans | <i>Pollicipes pollicipes</i>     |
| September 12, 2021 | IEO. Sada. Porto       | Betanzos | Bivalves    | <i>Ostrea edulis</i>             |
| October 6, 2021    | Vigo. Praia Canido     | Vigo     | Bivalves    | <i>Mytilus galloprovincialis</i> |
| October 6, 2021    | Vigo. Praia Canido     | Vigo     | Gastropods  | <i>Haliotis tuberculata</i>      |
| October 6, 2021    | Vigo. Praia Canido     | Vigo     | Gastropods  | <i>Patella vulgata</i>           |
| October 6, 2021    | Vigo. Praia Canido     | Vigo     | Gastropods  | <i>Monodonta lineata</i>         |
| September 2, 2021  | 42.0436, -9.1135*      | Vigo     | Cephalopods | <i>Eledone cirrhosa</i>          |
| September 3, 2021  | 41.9055, -9.076*       | Vigo     | Crustaceans | <i>Pagurus excavatus</i>         |
| September 2, 2021  | 42.0436, -9.1135*      | Vigo     | Crustaceans | <i>Polybius henslowii</i>        |
| September 3, 2021  | 41.9055, -9.076*       | Vigo     | Gastropods  | <i>Neptunea contraria</i>        |
| September 2, 2021  | 42.0436, -9.1135*      | Vigo     | Cephalopods | <i>Illex coindetti</i>           |
| February 3, 2022   | Vigo. Praia de Samil   | Vigo     | Crustaceans | <i>Polybius henslowii</i>        |
| June 16, 2022      | Vigo. Praia Canido     | Vigo     | Echinoderms | <i>Paracentrotus lividus</i>     |
| June 16, 2022      | Vigo. Praia Canido     | Vigo     | Crustaceans | <i>Eriphia verrucosa</i>         |
| June 16, 2022      | Vigo. Praia Canido     | Vigo     | Crustaceans | <i>Necora puber</i>              |
| June 16, 2022      | Vigo. Praia Canido     | Vigo     | Bivalves    | <i>Mytilus galloprovincialis</i> |
| June 16, 2022      | Vigo. Praia Canido     | Vigo     | Gastropods  | <i>Patella spp.</i>              |
| June 16, 2022      | Vigo. Praia Canido     | Vigo     | Gastropods  | <i>Haliotis tuberculata</i>      |
| June 16, 2022      | Vigo. Praia Canido     | Vigo     | Crustaceans | <i>Pollicipes pollicipes</i>     |
| June 16, 2022      | Vigo. Praia Canido     | Vigo     | Gastropods  | <i>Monodonta lineata</i>         |
| June 16, 2022      | Vigo. Praia Canido     | Vigo     | Cnidarias   | <i>Anemonia viridis</i>          |
| June 27, 2022      | Vigo. Monteferro       | Vigo     | Gastropods  | <i>Patella spp.</i>              |
| June 27, 2022      | Vigo. Monteferro       | Vigo     | Gastropods  | <i>Monodonta lineata</i>         |

|                 |                           |          |             |                                  |
|-----------------|---------------------------|----------|-------------|----------------------------------|
| June 27, 2022   | Vigo. Monteferro          | Vigo     | Cnidarias   | <i>Anemonia viridis</i>          |
| June 27, 2022   | Vigo. Monteferro          | Vigo     | Crustaceans | <i>Necora puber</i>              |
| June 27, 2022   | Vigo. Monteferro          | Vigo     | Crustaceans | <i>Eriphia verrucosa</i>         |
| June 27, 2022   | Vigo. Monteferro          | Vigo     | Crustaceans | <i>Maja squinado</i>             |
| July 12, 2022   | Vigo. Cabo Estai          | Vigo     | Gastropods  | <i>Monodonta lineata</i>         |
| July 12, 2022   | Vigo. Cabo Estai          | Vigo     | Gastropods  | <i>Patella spp.</i>              |
| July 12, 2022   | Vigo. Cabo Estai          | Vigo     | Echinoderms | <i>Paracentrotus lividus</i>     |
| July 12, 2022   | Vigo. Cabo Estai          | Vigo     | Crustaceans | <i>Eriphia verrucosa</i>         |
| July 12, 2022   | Vigo. Cabo Estai          | Vigo     | Crustaceans | <i>Palaemon serratus</i>         |
| July 12, 2022   | Vigo. Cabo Estai          | Vigo     | Cnidarias   | <i>Anemonia viridis</i>          |
| July 12, 2022   | A Coruña. Praia da Cruz   | A Coruña | Echinoderms | <i>Paracentrotus lividus</i>     |
| July 12, 2022   | A Coruña. Praia da Cruz   | A Coruña | Bivalves    | <i>Mytilus galloprovincialis</i> |
| July 12, 2022   | A Coruña. Praia da Cruz   | A Coruña | Gastropods  | <i>Patella spp.</i>              |
| July 12, 2022   | A Coruña. Praia da Cruz   | A Coruña | Gastropods  | <i>Monodonta lineata</i>         |
| July 28, 2022   | A Coruña. Praia de Oza    | A Coruña | Bivalves    | <i>Mytilus galloprovincialis</i> |
| July 28, 2022   | A Coruña. Praia de Oza    | A Coruña | Bivalves    | <i>Ostrea edulis</i>             |
| August 11, 2022 | Mougás. Praia Pedra Rubia | Vigo     | Gastropods  | <i>Haliotis tuberculata</i>      |
| August 11, 2022 | Mougás. Praia Pedra Rubia | Vigo     | Crustaceans | <i>Palaemon serratus</i>         |
| August 11, 2022 | Mougás. Praia Pedra Rubia | Vigo     | Echinoderms | <i>Paracentrotus lividus</i>     |
| August 11, 2022 | Mougás. Praia Pedra Rubia | Vigo     | Echinoderms | <i>Aplysia</i>                   |
| August 11, 2022 | Mougás. Praia Pedra Rubia | Vigo     | Cnidarias   | <i>Anemonia viridis</i>          |
| August 11, 2022 | Mougás. Praia Pedra Rubia | Vigo     | Crustaceans | <i>Pollicipes pollicipes</i>     |
| August 11, 2022 | Mougás. Praia Pedra Rubia | Vigo     | Gastropods  | <i>Patella spp.</i>              |
| August 11, 2022 | Mougás. Praia Pedra Rubia | Vigo     | Gastropods  | <i>Monodonta lineata</i>         |
| August 11, 2022 | Mougás. Praia Pedra Rubia | Vigo     | Bivalves    | <i>Mytilus galloprovincialis</i> |
| August 11, 2022 | Mougás. Praia Pedra Rubia | Vigo     | Echinoderms | <i>Asterina spp.</i>             |
| August 26, 2022 | Baiona. Cabo Silleiro     | Vigo     | Crustaceans | <i>Pollicipes pollicipes</i>     |
| August 26, 2022 | Baiona. Cabo Silleiro     | Vigo     | Echinoderms | <i>Paracentrotus lividus</i>     |
| August 26, 2022 | Baiona. Cabo Silleiro     | Vigo     | Gastropods  | <i>Patella spp.</i>              |

|                   |                        |      |             |                                  |
|-------------------|------------------------|------|-------------|----------------------------------|
| August 26, 2022   | Baiona. Cabo Silleiro  | Vigo | Echinoderms | <i>Asterina spp.</i>             |
| August 26, 2022   | Ramalloso. Esteiro Foz | Vigo | Bivalves    | <i>Mytilus galloprovincialis</i> |
| August 26, 2022   | Ramalloso. Esteiro Foz | Vigo | Bivalves    | <i>Ruditapes decussatus</i>      |
| August 26, 2022   | Ramalloso. Esteiro Foz | Vigo | Bivalves    | <i>Cardiidae</i>                 |
| August 26, 2022   | Ramalloso. Esteiro Foz | Vigo | Crustaceans | <i>Necora puber</i>              |
| September 1, 2022 | Cangas. Punta Balea    | Vigo | Crustaceans | <i>Palaemon serratus</i>         |
| September 1, 2022 | Cangas. Punta Balea    | Vigo | Echinoderms | <i>Paracentrotus lividus</i>     |
| September 1, 2022 | Cangas. Punta Balea    | Vigo | Gastropods  | <i>Monodonta lineata</i>         |
| September 1, 2022 | Cangas. Punta Balea    | Vigo | Bivalves    | <i>Venus verrucosa</i>           |
| September 1, 2022 | Cangas. Punta Balea    | Vigo | Gastropods  | <i>Patella spp.</i>              |
| September 1, 2022 | Cangas. Punta Balea    | Vigo | Echinoderms | <i>Asterina spp.</i>             |
| September 1, 2022 | Cangas. Punta Balea    | Vigo | Crustaceans | <i>Necora puber</i>              |
| September 1, 2022 | Cangas. Punta Balea    | Vigo | Cnidarias   | <i>Anemonia viridis</i>          |
| September 1, 2022 | Cangas. Punta Balea    | Vigo | Bivalves    | <i>Mytilus galloprovincialis</i> |
| September 9, 2022 | Ramalloso. Esteiro Foz | Vigo | Bivalves    | <i>Mytilus galloprovincialis</i> |
| September 9, 2022 | Ramalloso. Esteiro Foz | Vigo | Bivalves    | <i>Ruditapes decussatus</i>      |
| September 9, 2022 | Ramalloso. Esteiro Foz | Vigo | Bivalves    | <i>Cerastoderma edule</i>        |
| September 9, 2022 | Ramalloso. Esteiro Foz | Vigo | Crustaceans | <i>Necora puber</i>              |
| September 9, 2022 | Vigo. Praia Canido     | Vigo | Echinoderms | <i>Paracentrotus lividus</i>     |
| September 9, 2022 | Vigo. Praia Canido     | Vigo | Gastropods  | <i>Haliotis tuberculata</i>      |
| September 9, 2022 | Vigo. Praia Canido     | Vigo | Crustaceans | <i>Necora puber</i>              |
| September 9, 2022 | Vigo. Praia Canido     | Vigo | Crustaceans | <i>Eriphia verrucosa</i>         |
| September 9, 2022 | Vigo. Praia Canido     | Vigo | Gastropods  | <i>Patella spp.</i>              |
| September 9, 2022 | Vigo. Praia Canido     | Vigo | Crustaceans | <i>Palaemon serratus</i>         |
| September 9, 2022 | Vigo. Praia Canido     | Vigo | Gastropods  | <i>Monodonta lineata</i>         |

*n.i.* Unidentified

\*Coordinates indicated in decimal degrees



Table S2. Multiple Reaction Monitoring (MRM) conditions for lipophilic toxins determination. Precursor ion Q1 = m/z ratio in the first quadrupole, Product ion Q3 = m/z ratio in the third quadrupole, RT (min) = retention time, DP(v) = declustering potential, EP(v) = entrance potential, CE(v) = collision energy, and CXP(v) = collision cell exit potential.

| Toxins       | Precursor ion Q1 | Product ion Q3 | RT (min) | DP (v) | EP (v) | CE (v) | CXP (v) | Polarity |
|--------------|------------------|----------------|----------|--------|--------|--------|---------|----------|
| AZA1         | 842.3            | 824.5          | 8.3      | 126    | 10     | 43     | 10      | positive |
| AZA1         | 842.3            | 806.4          | 8.3      | 126    | 10     | 55     | 10      | positive |
| AZA2         | 856.3            | 838.4          | 8.7      | 116    | 10     | 45     | 24      | positive |
| AZA2         | 856.3            | 820.5          | 8.7      | 135    | 10     | 44     | 6       | positive |
| AZA3         | 828.3            | 810.5          | 8.1      | 116    | 10     | 43     | 10      | positive |
| AZA3         | 828.3            | 792.4          | 8.1      | 116    | 10     | 55     | 10      | positive |
| 13-desm SPXC | 692.3            | 674.5          | 5.2      | 146    | 10     | 45     | 18      | positive |
| 13-desm SPXC | 692.3            | 444.3          | 5.2      | 146    | 10     | 51     | 14      | positive |
| OA           | 803.4            | 255.0          | 7.3      | -210   | -10    | -64    | -9      | negative |
| OA           | 803.4            | 112.7          | 7.3      | -210   | -10    | -91    | -5      | negative |
| DTX2         | 803.4            | 255.0          | 7.6      | -210   | -10    | -64    | -9      | negative |
| DTX2         | 803.4            | 112.0          | 7.6      | -210   | -10    | -91    | -5      | negative |
| DTX1         | 817.4            | 255.0          | 8.3      | -230   | -10    | -62    | -9      | negative |
| DTX1         | 817.4            | 112.7          | 8.3      | -230   | -10    | -102   | -11     | negative |
| PTX2         | 876.5            | 823.5          | 7.7      | 85     | 10     | 35     | 35      | positive |
| PTX2         | 876.5            | 213.1          | 7.7      | 85     | 10     | 52     | 20      | positive |
| YTX          | 1141.3           | 1061.4         | 7.5      | -95    | -10    | -50    | -13     | negative |
| YTX          | 1141.3           | 855.3          | 7.5      | -95    | -10    | -104   | -11     | negative |

| Toxins               | Precursor ion Q1 | Product ion Q3 | RT (min) | DP (v) | EP (v) | CE (v) | CXP (v) | Polarity |
|----------------------|------------------|----------------|----------|--------|--------|--------|---------|----------|
| 45-OH-YTX            | 1157.6           | 1077.6         | 6.4      | -105   | -10    | -50    | -13     | negative |
| 45-OH-YTX            | 1157.6           | 855.5          | 6.4      | -105   | -10    | -104   | -11     | negative |
| homoYTX              | 1155.6           | 1075.6         | 7.5      | -95    | -10    | -50    | -13     | negative |
| homoYTX              | 1155.6           | 869.5          | 7.5      | -95    | -10    | -104   | -11     | negative |
| 45-OH-homo-YTX       | 1171.6           | 1091.6         | 6.4      | -95    | -10    | -50    | -13     | negative |
| 45-OH-homo-YTX       | 1171.6           | 869.5          | 6.4      | -95    | -10    | -104   | -11     | negative |
| PnTXG                | 694.5            | 676.4          | 5.7      | 60     | 10     | 40     | 13      | positive |
| PnTXG                | 694.5            | 164.1          | 5.7      | 60     | 10     | 50     | 13      | positive |
| GYMA                 | 508.3            | 490.4          | 4.5      | 60     | 10     | 40     | 13      | positive |
| GYMA                 | 508.3            | 392.4          | 4.5      | 60     | 10     | 45     | 13      | positive |
| 13-<br>19diDesMeSPXC | 678.4            | 660.4          | 4.8      | 166    | 10     | 41     | 6       | positive |
| 13-<br>19diDesMeSPXC | 678.4            | 642.3          | 4.8      | 166    | 10     | 45     | 12      | positive |
| 20-methyl SPXG       | 706.4            | 688.4          | 5.3      | 166    | 10     | 37     | 6       | positive |
| 20-methyl SPXG       | 706.4            | 670.4          | 5.3      | 166    | 10     | 47     | 6       | positive |

Table S3. LOQs for lipophilic toxins determination with acidic chromatographic conditions.

| Toxins | LOQs ( $\mu\text{g kg}^{-1}$ ) |
|--------|--------------------------------|
| AZA1   | 30                             |

|                        |       |
|------------------------|-------|
| <b>AZA2</b>            | 30    |
| <b>AZA3</b>            | 30    |
| <b>OA</b>              | 30    |
| <b>DTX1</b>            | 30    |
| <b>DTX2</b>            | 30    |
| <b>PTX2</b>            | 30    |
| <b>YTX*</b>            | 0.075 |
| <b>homo-YTX*</b>       | 0.075 |
| <b>45-OH-YTX*</b>      | 0.075 |
| <b>45-OH-homo-YTX*</b> | 0.075 |
| <b>13-desm SPXC</b>    | 30    |

\*Units in mg kg<sup>-1</sup>
